1           **INHIBITION OF NITRIC OXIDE SYNTHESIS BY DEXAMETHASONE**  
2           **INCREASES SURVIVAL RATE IN *Plasmodium berghei*-INFECTED MICE**

3    Danilo Reymão Moreira<sup>1</sup>; Ana Carolina Musa Gonçalves Uberti<sup>1</sup>, Antonio Rafael  
4    Quadros Gomes<sup>1</sup>; Michelli Erica Souza Ferreira<sup>1</sup>; Rogério Silva Santos<sup>1</sup>; Michael  
5    Dean Green<sup>2</sup>; José Ricardo dos Santos Vieira<sup>1</sup>; Maria Fani Dolabela<sup>3</sup>; Sandro  
6    Percário<sup>1\*</sup>

7           <sup>1</sup> Oxidative Stress Research Laboratory, Institute of Biological Sciences,  
8           Federal University of Pará, Av. Augusto Corrêa, 01, Belém, Pará, Brazil,  
9           66075-110. [alydan@hotmail.com](mailto:alydan@hotmail.com) (DRM), [acmusa23@yahoo.com.br](mailto:acmusa23@yahoo.com.br)  
10          (ACMGU), [rafaelquadros13@hotmail.com](mailto:rafaelquadros13@hotmail.com) (ARQG),  
11          [michelli\\_quimifarm@yahoo.com.br](mailto:michelli_quimifarm@yahoo.com.br) (MESF), [rogeriosst@gmail.com](mailto:rogeriosst@gmail.com) (RSS),  
12          [jrvieira@ufpa.br](mailto:jrvieira@ufpa.br) (JRSV), [percario@ufpa.br](mailto:percario@ufpa.br), [spercario49@gmail.com](mailto:spercario49@gmail.com) (SP).

13          <sup>2</sup> Division of Parasitic Diseases and Malaria, the US Centers for Disease  
14          Control and Prevention, 1600 Clifton Rd. NE, Mailstop G49, Atlanta,  
15          Georgia, United States of America, 30329, [mdg4@cdc.gov](mailto:mdg4@cdc.gov) (MDG).

16          <sup>3</sup> Institute of Health Sciences, Federal University of Pará, Av. Augusto  
17          Corrêa, 01, Belém, Pará, Brazil, 66075-110. [fani@ufpa.br](mailto:fani@ufpa.br) (MFD).

18    \* Corresponding author

19

20 **Abstract**

21 Malaria still presents great epidemiologic importance by its high incidence in the  
22 world and potential clinical severity. *Plasmodium* parasites are highly susceptible to  
23 changes in the redox balance and the relationship between the redox state of the  
24 parasite and host cells is very complex and involves nitric oxide (NO) synthesis.  
25 Thus, the present study is aimed at evaluating the effects of NO synthesis on the  
26 redox status, parasitemia evolution and survival rate of *Plasmodium berghei*-  
27 infected mice. Two-hundred and twenty-five mice were infected with *Plasmodium*  
28 *berghei* and submitted to the stimulation or inhibition of NO synthesis. The  
29 stimulation of NO synthesis was performed through the administration of L-  
30 arginine, while its inhibition was made by the administration of dexamethasone.  
31 Inducible NO synthase (iNOS) inhibition by dexamethasone promoted an increase  
32 in the survival rate of *P. berghei*-infected mice and data suggested the participation  
33 of oxidative stress in brain as a result of plasmodial infection, as well as the  
34 inhibition of brain NO synthesis, which promoted survival rate of almost 90% of the  
35 animals until the 15<sup>th</sup> day of infection, with possible direct interference of ischemia  
36 and reperfusion syndrome, as seen by increased levels of uric acid. Inhibition of  
37 iNOS caused a decrease of parasitemia and increased survival rate of infected  
38 animals, suggesting that the synthesis of NO may stimulate a series of  
39 compensatory redox effects that, if overstimulated, may be responsible for the  
40 onset of severe forms of malaria.

41 **Key words:** Nitric oxide, malaria, oxidative stress, dexamethasone, L-arginine,  
42 *Plasmodium berghei*, Inducible nitric oxide synthase, parasitemia, survival rate.

43

## 44 INTRODUCTION

45 Malaria is an acute febrile infectious disease whose etiological agents are  
46 protozoa of genus *Plasmodium*. Five species are known to infect man:  
47 *Plasmodium vivax*, *P. falciparum*, *P. malariae*, *P. ovale* and *P. knowlesi*. Although  
48 there are evidences of the occurrence of the disease since 2700 B.C. (Cox, 2002),  
49 it is of epidemiological importance still today by its high incidence in the world and  
50 potential clinical severity, causing considerable social and economic losses in the  
51 population at risk, especially to ones in precarious conditions of dwelling and  
52 sanitation (WHO, 2011).

53 According to the World Health Organization (WHO) malaria is a significant  
54 public health problem in 108 countries and causes approximately 130 million new  
55 cases each year (WHO, 2014), resulting in 445 thousand deaths in 2016 (WHO,  
56 2017). About 90% of these deaths occur in sub-Saharan Africa and it is estimated  
57 that the disease kills a child every 30 seconds (WHO, 2011).

58 Usually, the severe cases of the disease are related to the infection by *P.*  
59 *falciparum*. Among the complications that are worth mentioning are cerebral  
60 malaria and pulmonary complications (Botelho *et al.* 1996; Van der Heyde *et al.*  
61 2000; Taylor *et al.* 2006; Penet *et al.* 2007). However, the mechanisms that trigger  
62 the pathogeny of malaria and the appearance of severe forms are yet not fully  
63 elucidated and additional studies are necessary.

64 In this regard, several authors recently discuss the involvement of free  
65 radicals in the physiopathogenesis of malaria (Huber *et al.* 2002; Dondorp *et al.*  
66 2003; Pabon *et al.* 2003; Omodeo-Salé *et al.* 2003; Jaramillo *et al.* 2003; Becker *et*  
67 *al.* 2004; Yazar *et al.* 2004; Wilmanski *et al.* 2005; Kumar and Bandyopadhyay  
68 2005; Dey *et al.* 2009; Percário *et al.* 2012; Vale *et al.* 2015). This involvement can  
69 be related to the pathogenic mechanisms triggered by the parasite (Potter *et al.*  
70 2005), as well as by the production of free radicals (Keller *et al.* 2004), and  
71 antioxidant defenses (Sohail *et al.* 2007) by host cells as an attempt to fight the  
72 infection.

73           During the development of blood stages of *P. falciparum*, trophozoites  
74 increase the viscosity of erythrocytes, by causing modifications on the cell surface  
75 that allow its adhesion to the endothelial wall of capillaries, which seems to be a  
76 mechanism of defense of the parasite, preventing the passage of parasitized  
77 erythrocytes by the spleen and its consequent destruction (Luse and Miller 1971).  
78 This cytoadherence phenomenon is mediated by expressed parasite proteins, via  
79 stimulation of gene *var*, on the surface of infected red cell, interrupting the blood  
80 flow and harming the tissues irrigated by the obstructed vessels (Ferreira *et al.*  
81 2004; Pettersson *et al.* 2005), providing the conditions for the participation of  
82 ischemia and reperfusion syndrome (IRS), responsible for free radical production  
83 and, consequently, causing oxidative stress (Halliwell and Gutteridge 2015).

84           In fact, the level of oxidative stress is high in patients infected by *P. vivax*, as  
85 detected by the elevation of plasma levels of malondialdehyde - biochemical  
86 marker of lipid peroxidation (Farombi *et al.* 2003) - even in patients with non-severe  
87 forms of the disease (Pabon *et al.* 2003).

88           Additionally, oxidative changes in erythrocytes infected with *P. falciparum*  
89 seem to be associated to the accelerated aging of these cells and contribute to the  
90 development of the anemia displayed by these individuals (Omodeo-Salé *et al.*  
91 2003). The development of anemia can promote changes in the circulatory  
92 physiology, leading to the existence of moments of alternate hypoxia and tissue  
93 oxygenation at basal levels, thus, another inductor factor of IRS.

94           Moreover, in response to the infection, activated macrophages and  
95 neutrophils act as the natural defense mechanism of the host organism and these  
96 generate a large amount of free radicals by activation of respiratory burst, causing  
97 an imbalance between the formation of oxidant species and the activity of  
98 antioxidants. This imbalance triggers the oxidative stress, being an important  
99 mechanism of human host in response to microbial infections that, in the case of  
100 malaria, can lead to the death of parasites.

101           In this regard, the levels of oxidative stress markers in parasitized mice and  
102 humans are increased in comparison to non-infected controls (Sohail *et al.* 2007).

103 In these cases, oxidative stress seems to be the result of an increase in free  
104 radicals, and not a consequence of the decrease in the levels of antioxidants,  
105 reinforcing the suggestion that oxidative stress is an important mechanism induced  
106 by the infection (Pabon *et al.* 2003).

107 In fact, *Plasmodium* is highly susceptible to alterations in the redox balance,  
108 which can contribute to clinical manifestations of the severe cases of the disease,  
109 such as cerebral malaria (Narsaria *et al.* 2012). In parallel, the relationship  
110 between the redox state of the parasite and host cells is very complex and involves  
111 production of nitric oxide (NO; Becker *et al.* 2004; Gomes *et al.* 2015).

112 Nevertheless, the role of NO in malaria is still controversial. Some  
113 researchers say that cerebral malaria results from the production of high amounts  
114 of NO in order to promote the death of parasites (Favre *et al.* 1999; Maneerat *et al.*  
115 2000), whereas others defend the suggestion that cerebral malaria arises from a  
116 low bioavailability of this gas (Gramaglia *et al.* 2006).

117 Perterson *et al.* (2007), demonstrated that NO synthesis derived from  
118 ingested blood in the digestive tract of the mosquito, induces the formation of toxic  
119 derivatives, limiting the development of the parasite. As to protect themselves from  
120 the damage induced by these toxic nitrogenated derivatives, the mosquito  
121 produces pyridoxines, antioxidant enzymes capable of synthesizing NO in response  
122 to parasitemia (Herrera-Ortiz *et al.* 2004).

123 Nahrevania & Dascombe (2006) identified the increase of NO synthesis in  
124 *P. berghei*-infected mice and verified its correlation with the increase of the activity  
125 of immunologic cells (lymphocytes CD19, macrophages and monocytes).

126 In fact, some researchers suggest a protective role of nitric oxide in the  
127 development of severe malaria and indicate it as possible adjuvant in malaria drug  
128 therapy (Yeo *et al.* 2007, 2008; Dhangadamajhi *et al.* 2009). As suggested by  
129 Planche *et al.* (2010), the activation of NOS II is essential for the additional  
130 production of NO and elimination of the parasite.

131 On the other hand, Cabrales *et al.* (2011) associated the development of  
132 cerebral manifestations of the inadequacy of NO production, which seems to be  
133 essential in maintaining cerebral circulatory hemodynamics.

134 In mice deficient of interleukin 4 (IL-4), it was found that the increase of  
135 iNOS expression and the activity of natural killer cells producing IFN- $\gamma$ , resulted in  
136 protection of animals even in the initial phase of infection by *P. berghei* (Saefel *et al.*  
137 *al.* 2004).

138 Moreover, some parasitic molecules are well known as NO inducers, such  
139 as the malarial pigment hemozoin, which associated to IFN- $\gamma$ , is a potent NO  
140 inducer in macrophages, involving the kinase regulated extracellular signaling  
141 (ERK) pathway and nuclear factor kappa B (NF- $\kappa$ B). It is also known that in the  
142 hepatic stage, the defense mechanisms are strictly related to the production of  
143 IFN- $\gamma$  by NK cells, with posterior synthesis of NO (Saefel *et al.* 2004). In addition, it  
144 was found that hemozoin is also responsible for the activation of macrophages by  
145 mechanisms partially dependent on NO (Jaramillo *et al.* 2005) and other ROS,  
146 such as superoxide ( $O_2^-$ ) and hydrogen peroxide ( $H_2O_2$ : Brinkmann *et al.* 1984).

147 Similarly, increased levels of iNOS in human monocytes are associated with  
148 non-worsening malaria in patients infected by *P. falciparum* (Chiwakata *et al.*  
149 2000).

150 Syarifah *et al.* (2003), studying *P. berghei*-infected mice susceptible and  
151 resistant to the development of cerebral malaria, observed that cytokine expression  
152 was increased in resistant animals in relation to susceptible, as well as the  
153 expression of NO, worth mentioning the high production of TNF- $\alpha$  in resistant mice,  
154 suggesting that the activation of macrophages is significantly greater in those  
155 animals.

156 Three isoforms of nitric oxide synthase enzymes (NOS) were described so  
157 far, with two constitutive forms and one inducible form. Constitutive forms produce  
158 low amounts of NO for a long period, apparently being responsible for the  
159 physiological production of NO. The inducible form (iNOS or NOS II) is activated by

160 factors, such as bacterial lipopolysaccharide (LPS) and cytokines (TNF- $\alpha$  e IFN- $\gamma$ ),  
161 producing large amounts of NO in a short space of time (Försterman and Sessa  
162 2012).

163 All NOS enzymes use L-arginine as substrate, as well as molecular oxygen  
164 (O<sub>2</sub>) and reduced nicotinamide adenine dinucleotide phosphate (NADPH) as co-  
165 substrates, and flavine-adenine dinucleotide (FAD), flavine-mononucleotide (FMN)  
166 and (6R-)5,6,7,8-tetrahydro-L-biopterine (BH<sub>4</sub>) as cofactors (Försterman and  
167 Sessa 2012). The administration of L-arginine has been employed to stimulate the  
168 activity of iNOS in several studies, yet with controversial results (Percário *et al.*  
169 2012).

170 On the other hand, NOS enzymes can be selectively inhibited. Among the  
171 most used inhibitors, N-nitro-L-arginine methyl ester (L-NAME) and N-monomethyl-  
172 L-arginine (L-NMMA) inhibit both forms of the enzyme, while aminoguanidine and  
173 dexamethasone selectively inhibit iNOS (Walker *et al.* 1997).

174 Dexamethasone is a glucocorticoid drug and acts on nuclear receptors  
175 directly interfering in gene expression in a variety of cell types (Katzung and Trevor  
176 2017) and modulating the transcription of genes involved in the control of  
177 inflammatory process (Barnes *et al.* 1993). Since the beginning of the 1990s, some  
178 authors identified the effect of dexamethasone inhibiting iNOS expression in most  
179 diverse cell types: mesangial cells (Pfeilschifter and Schwarzenbach 1990), murine  
180 macrophages (Di Rosa *et al.* 1990), human endothelial cells (Radomski *et al.*  
181 1990), rat hepatocytes (Geller *et al.* 1994), murine fibroblasts (Gilbert and  
182 Herschman 1993), and human epithelial cells (Kleinert *et al.* 2004). De Vera *et al.*  
183 (1997) attributes this action of dexamethasone by the inhibition of NF $\kappa$ B and to the  
184 activation of its inhibitory factor (I $\kappa$ B). Regardless of the route used by  
185 dexamethasone, there is no doubt that NOS inhibition is independent of L-arginine  
186 concentration and greatly affects the expression of mRNA for the inducible enzyme  
187 (Korhonen *et al.* 2002; Skimming *et al.* 2003).

188 Administering dexamethasone to *P. berghei* infected mice significantly  
189 reduces symptoms of cerebral malaria (Neill and Hunt 1995; Sanni *et al.* 1998)

190 In the present study it was demonstrated that the selective inhibition of iNOS  
191 by dexamethasone reduced the progression of parasitemia in *P. berghei*-infected  
192 mice and increased the survival rate of the animals.

## 193 **METHODS**

194 Two-hundred and twenty-five male Swiss mice (*Mus musculus*), young adults (25-  
195 35 g), from the Evandro Chagas Institute (Belem, PA, Brazil) were randomly  
196 divided into three groups, each of them further divided into five sub-groups (n=15  
197 each), according to time of animals' euthanasia (one, five, ten, fifteen or twenty  
198 days after inoculation), and samples of lung tissue and blood were collected for the  
199 evaluation of oxidative stress markers, total antioxidant status, uric acid and  
200 assessment of percentage of parasitemia, as follows:

201 **Positive control groups** (N=15 for each sub-group): animals were inoculated with  
202 *P. berghei*-infected erythrocytes and received 10 µl of sterile distilled water per 25  
203 g of body weight (gavage) two hours prior to the inoculation of *P. berghei* and daily,  
204 until the day of animals' euthanasia.

205 **Dexamethasone groups** (N=15 for each sub-group): animals were inoculated with  
206 *P. berghei* in the same way that groups PC and treated with dexamethasone, as  
207 described below, until the day of animals' euthanasia.

208 **L-Arginine groups** (N=15 for each sub-group): animals were inoculated with *P.*  
209 *berghei* in the same way that groups PC and simultaneously treated with L-  
210 arginine, as described below, until the day of animals' euthanasia.

211 All animals were assigned into sub-groups by simple randomization using the sub-  
212 group sequence generated after sortition (Suresh 2011) and were maintained in  
213 the vivarium at the Federal University of Pará (UFPA, Belém, PA, Brazil) in



214 polystyrene cages containing five animals each, kept under 12 h light/dark cycles,  
215 controlled temperature (25°C), and received rodent chow (Labina™, Presence,  
216 Brazil), and tap water *ad libitum* for one, five, ten, fifteen or twenty days after  
217 infection and, at the end of each period, animals were submitted to heparin  
218 administration (100 UI heparin sulfate, ip.), anesthetized with 50 µl of  
219 intraperitoneal ketamine (5%)-xylazine (2%), sample collection, and underwent  
220 euthanasia by exsanguination. Absolutely all efforts were made to minimize  
221 suffering to animals.

222 After thoracotomy, blood samples were obtained by cardiac puncture of the right  
223 ventricle and both lungs and brain were removed. The project followed the  
224 international guidelines for research with experimental animals and procedures  
225 were reviewed and approved by the Ethics Committee in Research with  
226 Experimental Animals of the Federal University of Pará - CEPAE/UFPA (Report  
227 No. MED0126/2013).

### 228 **Features of the animal model**

229 Swiss mice are widely used as a malaria model and presents the same pattern of  
230 infection progression and basic features of lung and cerebral malaras of other  
231 mice species. Moreover, *P. berghei* possesses genomic sequences similar to *P.*  
232 *falciparum* (Otto *et al.* 2014) and cause clinical features on animals that mimic  
233 human *falciparum* malaria (Penet *et al.* 2007). Taken together, the  
234 histopathological features described are similar to those displayed in severe  
235 malaria human cases.

### 236 **Malaria induction**

237 Mice were kept in the vivarium for two weeks and underwent clinical examination  
238 prior malaria induction through intraperitoneal inoculation of  $10^6$  *P. berghei* ANKA-  
239 infected erythrocytes (in 0.2 mL sterile saline solution). The strain of *P. berghei*  
240 was supplied by the Neurochemistry Laboratory of the Federal University of Pará -  
241 UFPA and three times replicated in Swiss mice before being used in animals of this  
242 study.

### 243 **Treatments**

244 *Dexamethasone* (Teuto, Cat # 095214): administered in the dose of 5mg/Kg of  
245 animal weight.

246 *L-arginine* (Sigma Aldrich, Cat # A5006): prepared in 0.9% PBS, and administered  
247 in a dose of 120 mg/Kg of animal weight (Chatterjee *et al.* 2007).

248 Both dexamethasone and L-arginine were administered 24h prior infection and  
249 every 24h henceforth, until the day of animal euthanasia.

### 250 **Tissue processing**

251 After removal, lungs and brain were perfused with PBS to wash out the blood  
252 trapped inside. The tissue was weighed and added to PBS in the ratio of 1:10  
253 (m:v). The homogenization process was performed in an ultrasonic cell disruptor  
254 (D Cel; Thornton, Indaiatuba, Brazil). During the process, the glass beaker  
255 containing the material was kept on ice to prevent sample damage. The  
256 homogenate was centrifuged at  $175 \times g$  (15 min) and the supernatant collected and  
257 stored in a freezer at  $-20^\circ\text{C}$  until analyzed.

### 258 **Technical Procedure**

259 Along with blood parasitemia determination, laboratory measurements of trolox  
260 equivalent antioxidant capacity (TEAC), thiobarbituric acid reactive substances

261 (TBARS), Uric Acid (AU), and nitrites and nitrates (NN) were performed in  
262 duplicate on tissue samples. Internal controls and standards were inserted in each  
263 batch for the quality assurance of determinations.

#### 264 **Determination of parasitemia**

265 *Plasmodium berghei*-infected erythrocytes were counted on blood smears obtained  
266 by puncture of the caudal vein of animals on the day of euthanasia (one, five, ten,  
267 fifteen, and twenty days of infection). After drying at room temperature, the smear  
268 was fixed with methanol for 2 min and stained with Giemsa for 10 min.  
269 Subsequently, slides were washed in tap water and, after drying, erythrocytes were  
270 counted on an optical microscope (Olympus, CX2) with 100x magnification.

#### 271 **Determination of Trolox Equivalent Antioxidant Capacity (TEAC)**

272 Trolox (6-hydroxy-2,5,7,8-tetramethylchromane-2-carboxylic acid; Sigma-Aldrich  
273 23881-3) is a powerful antioxidant water-soluble vitamin E analogue. The method  
274 proposed by Miller *et al.* (1993) modified by Re *et al.* (1999) was followed, a  
275 colorimetric technique based on the reaction between ABTS (2,2'-Azino-bis-3-  
276 ethylbenzothiazoline-6-sulfonic acid; Sigma-Aldrich; 1888) with ammonium  
277 persulfate potassium ( $K_2S_2O_8$ ; Sigma-Aldrich; 60490), producing the radical cation  
278  $ABTS^{\bullet+}$ , chromophore of green/blue color. The addition of antioxidants to  $ABTS^{\bullet+}$   
279 reduces it again to ABTS, on a scale dependent on antioxidant capacity,  
280 concentration of antioxidants and duration of the reaction. This can be measured  
281 by spectrophotometry by observing the change in absorbance read at 734nm for  
282 five minutes (Fento, Sao Paulo, Brazil; 800 XI). Finally, the total antioxidant activity  
283 of the sample is calculated as its relationship with the reactivity of the Trolox as

284 standard, through the implementation of standard curve under the same  
285 conditions.

### 286 **Determination of Thiobarbituric Acid Reactive Substances (TBARS)**

287 TBARS is a method that evaluates lipid peroxidation and was used as an indicator  
288 of oxidative stress. This technique is based on the reaction of malondialdehyde  
289 (MDA), among other substances, with thiobarbituric acid (TBA; Sigma-Aldrich  
290 T5500), in low pH and high temperature, yielding MDA-TBA complex of pink color,  
291 and absorbance peak at 535 nm.

292 The technical procedure was performed according to the protocol proposed by  
293 Khon and Liversedge (1944), adapted by Percario *et al.* (1994). In brief: initial TBA  
294 solution (10 nM) was prepared in phosphate monobasic potassium ( $\text{KH}_2\text{PO}_4$  75  
295 mM; Synth; 35210) adjusted to pH 2.5 with acetic acid. Two hundred and fifty  $\mu\text{L}$   
296 of sample was added to 500  $\mu\text{L}$  of TBA solution, mixed and placed in a water bath  
297 ( $95^\circ\text{C} \times 60$  min); after cooling at room temperature, 2.0 ml of 1-butanol was added,  
298 vortex mixed and subsequently centrifuged ( $175 \times g \times 15$  min); 1.0 ml of the  
299 supernatant was collected and read at 535 nm (Fento, São Paulo, Brazil; 800 XI).  
300 1,1,3,3, tetraethoxypropane (Sigma-Aldrich; T9889) was used for the  
301 implementation of the standard curve.

### 302 **Nitrites and nitrates (NN)**

303 Much of nitric oxide released into the bloodstream is swept by hemoglobin in  
304 erythrocytes or converted to nitrite ( $\text{NO}_2^{\bullet}$ ) in the presence of molecular oxygen.  
305 Nitrite reacts with oxyhemoglobin, leading to the formation of nitrate ( $\text{NO}_3^{\bullet}$ ) and  
306 methemoglobin. Due to its stability,  $\text{NO}_2^{\bullet}$  has been widely used to confirm the prior

307 existence of NO. The evaluation of this parameter was performed by means of  
308 spectrophotometry (Kit Total Nitrite/Nitrate, R & D Systems, KGE001). This  
309 technique is based on the quantitative determination of NO, involving the enzyme  
310 nitrate reductase, which converts nitrate to nitrite, followed by colorimetric detection  
311 of nitrite as a product of pink color, produced by the Griess reaction and that  
312 absorbs visible light at 540 nm (PerkinElmer, Victor X3). Nitrite concentration was  
313 calculated based on the absorbance found in the nitrites standard curve.

#### 314 **Uric acid**

315 Performed using the Kit Uric acid UOD-ANA (Labtest, Cat. 51-4/30).

316 The test is based on the production of H<sub>2</sub>O<sub>2</sub> from the reaction of uric acid with  
317 oxygen and water, catalyzed by uricase. This H<sub>2</sub>O<sub>2</sub> reacts with acid 3,5-dichloro-3-  
318 hydroxybenzene sulphonate (DHBS) and 4-aminoantipyrine in the presence of  
319 peroxidase, producing dye antipirylquinonimine. Samples were read at a  
320 spectrophotometer at 520nm (Biospectro, SP-22, Brazil).

#### 321 **Statistical Analysis**

322 Sample size was calculated by the method proposed by Dell *et al.* (2002). The  
323 occurrence of discrepant values (*outliers*) was investigated through calculation of  
324 interquartile range, which calculates the difference between the third quartile (Q3)  
325 and the first quartile (Q1), called dj. Any value lower than Q1 - 3/2 dj or greater  
326 than Q3 + 3/2 dj, was considered as *outlier* and, therefore, removed from  
327 mathematical calculations.

328 Aiming at investigating the existence of statistically significant differences between  
329 the studied variables between Groups, we applied ANOVA two factors, when the  
330 assumption of normality and homoscedasticity was met, or the Mann-Whitney test,

331 when the assumption of normality was not met, which occurred in the case of  
332 variable PARASITEMIA. The tests used to access the normality and  
333 homoscedasticity of the variables were Kolmogorov-Smirnov and Levene tests,  
334 respectively. When the null hypothesis between mean differences between the  
335 variables of the study groups was rejected, Tukey's test was applied, and when a  
336 statistically significant difference between medians was detected, Dunn's test was  
337 applied. In addition, within the same group the differences between the initial  
338 values (1 day of infection) and late values (20 days of infection) were studied by  
339 the Student's unpaired t test.

340 The existence of correlation between the variables was also analyzed by Pearson's  
341 correlation coefficient, considering all points obtained separately for each group  
342 studied. For the statistically significant correlations, intensities were assigned as  
343 follows:  $r$  up to 0.30 ( $r < 0.30$ ) as weak correlation;  $r$  between 0.31 and 0.70 ( $0.31 <$   
344  $r < 0.70$ ), as moderate correlation;  $r$  between 0.71 and 1.00 ( $0.71 < r < 1.00$ ) as  
345 strong correlation.

346 For the purposes of tests ANOVA and Mann-Whitney, statistical package  
347 SigmaStat version 3.5 was used, whereas for the calculation of correlations the  
348 statistical package SPSS version 17.0 was used. All statistical tests were applied  
349 considering the significance level of 5% ( $p < 0.05$ ).

### 350 **Availability of Data and Materials**

351 Data and full description of methods and materials are available at Zenodo  
352 repository, at <https://zenodo.org/record/45202#.VqeqifLVyid>.

353

354 **RESULTS**

355 As expected, parasitemia of infected animals progressively evolved in all groups,  
356 but the rate of progression was lower in dexamethasone-treated animals, which  
357 presented lower values than the other two groups at the end of the period of 20  
358 days ( $p=2.8 \times 10^{-5}$  vs. L-arginine and  $p=0.0227$  vs. control; Fig. 1). L-arginine-  
359 treated animals presented numerically higher values than the control group, but  
360 without statistical significance ( $p=0.3048$ ).

361 Similarly, the survival rate of dexamethasone-treated animals was significantly  
362 greater than that of the other groups, which behaved in a similar way, with 60% of  
363 animals alive at the end of the period of 20 days of infection (Fig. 2).

364 **TEAC:**

365 For the lung samples, all groups showed a slight decrease of TEAC values along  
366 the period of infection, however without statistically significant differences (Fig. 3A).  
367 Nevertheless, at the end of 20 days of infection, the group of animals treated with  
368 dexamethasone presented statistically lower values than the other two groups  
369 ( $p=0.0281$  vs. L-ARGININE and  $p=0.0033$  vs. CONTROL). For brain samples a  
370 similar behavior was observed, however an important decrease of TEAC after 10  
371 days of infection was identified (1 day vs. 10 days,  $p=0.0009$  for L-ARGININE and  
372  $p=7 \times 10^{-6}$  for DEXAMETHASONE), with both treated groups presenting values  
373 lower than the control group ( $p=0.0360$  vs. L-ARGININE and  $p=0.0261$  vs.  
374 DEXAMETHASONE). However, after the 10<sup>th</sup> day of infection the  
375 DEXAMETHASONE group presented an increase in TEAC values, displaying  
376 statistically higher values than the other groups ( $p=0.0357$  vs. L-ARGININE and  $p=$   
377  $0.0005$  vs. CONTROL).

378 **TBARS:**

379 Although none of the groups have presented important variation during the period  
380 of infection, Group L-ARGININE presented higher pulmonary TBARS values than  
381 the DEXAMETHASONE group at the end of the experiment ( $p=0.0282$ ). On the  
382 other hand, for brain samples, Group L-ARGININE showed progressive evolution  
383 over the period of the infection, with higher TBARS values in the 20<sup>th</sup> day of  
384 infection in relation to the first day ( $p=4.7 \times 10^{-7}$ ), but with no differences in relation  
385 to the other groups (Fig. 4).

386 The collective analysis of the values of TEAC and TBARS shows a quite unique  
387 pattern: while for lung samples the values of TEAC obtained are found in a high  
388 range of absolute values (9-12  $\mu\text{M}$ ), brain samples are in a low range (4-8 $\mu\text{M}$ ),  
389 whereas TBARS values presenting opposing behavior, i.e. for lung samples the  
390 values are in low range (80-120nmol/mL) and brain samples in high range (160-  
391 280nmol/mL).

392 **Nitrites and nitrates:**

393 No significant differences in the evolution of NN levels in any of the groups  
394 throughout the period of infection were seen, nor between groups for the lung  
395 samples (Fig. 5). However, for brain samples, group DEXAMETHASONE  
396 presented lower values than the other two groups during the studied period,  
397 culminating with statistically significant differences in the 20<sup>th</sup> day ( $p=0.0058$  vs. L-  
398 ARGININE and  $p=0.0201$  vs. CONTROL).

399 **Uric acid (AU):**

400 No temporal variation in AU values for lung samples in any of the groups were  
401 found (Fig. 6). However, Group L-ARGININE presented lower values than the other



402 two groups from the first to the 15<sup>th</sup> day of infection. Similarly, for brain samples,  
403 group L-ARGININE presented lower values than the other groups, with statistical  
404 significance at the 20<sup>th</sup> day of infection ( $p=0.0395$  vs. CONTROL and  $p=0.0407$  vs.  
405 DEXAMETHASONE). In contrast, group DEXAMETHASONE presented  
406 progressive behavior over the infection time, with brain AU values significantly  
407 greater for the 20<sup>th</sup> day in comparison to the first day ( $p=3.9 \times 10^{-4}$ ). Another  
408 noteworthy observation is that pulmonary AU values stood in a higher range (40-  
409 140mg/dL) than the brain (10-55mg/dL) for all groups.

#### 410 **Correlation studies:**

##### 411 *PARASITEMIA vs. TBARS*

412 The correlation between TBARS and PARASITEMIA revealed the existence of a  
413 negative and significant correlation only for the lung samples from the group  
414 DEXAMETHASONE (Additional file 1 Fig. 1;  $r=-0.29$ ;  $p=0.026$ ). The CONTROL  
415 group presented a negative correlation, however without statistical significance ( $r=-$   
416  $0.10$ ;  $p=0.20$ ), while for group L-ARGININE this correlation showed positive but  
417 non-significant values ( $r=0.06$ ;  $p=0.673$ ). For brain samples a positive trend was  
418 observed for all groups, but only with significance for group L-ARGININE  
419 (Additional file 1 Fig. 2;  $r=0.46$ ;  $p=0.002$ ).

##### 420 *TBARS vs. URIC ACID*

421 A positive correlation was observed for these parameters in both samples and for  
422 groups CONTROL (Additional file 1 Fig. 3-4;  $r=0.33$  and  $p=0.02$ , for lung;  $r=0.45$   
423 and  $p=0.050$ , for brain), and DEXAMETHASONE ( $r=0.26$  and  $p=0.041$ , for lung;  
424  $r=0.28$  and  $p=0.045$ , for brain). For group L-ARGININE, in both samples, the

425 values of the coefficient of correlation approached zero ( $r=0.08$  and  $p=0.140$ , for  
426 lung;  $r=0.03$  and  $p=0.858$ , for brain).

#### 427 *NN vs. TBARS*

428 For lung samples the existence of significant correlation for any of the studied  
429 groups was not observed (Additional file 1 Fig. 5). However, for brain samples,  
430 both groups CONTROL and DEXAMETHASONE presented significant positive  
431 correlations (Additional file 1 Fig. 6;  $r=0.30$  and  $p=0.048$  and  $r=0.34$  and  $p=0.014$ ,  
432 respectively).

#### 433 *TEAC vs. TBARS*

434 The existence of positive correlation in both samples and for both groups  
435 CONTROL (Additional file1 Fig. 7-8;  $r=0.32$  and  $p=0.024$ , for lung;  $r=0.50$  and  
436  $p=0.009$ , for brain) and DEXAMETHASONE, ( $r=0.23$  and  $p=0.031$ , for lung;  $r=0.27$   
437 and  $p=0.050$ , for brain) was seen. For the group L-ARGININE, in both samples, the  
438 values of the coefficient of correlation were negligible ( $r=0.05$  and  $p=0.821$ , for  
439 lung;  $r=0.14$  and  $p=0.374$ , for brain).

#### 440 *NN vs. PARASITEMIA*

441 No significant correlation was found for any of the groups, nor for any of the  
442 samples studied (Additional file1 Fig. 9-10).

#### 443 *Other Correlations*

444 In addition to the studies of correlation presented, we tested the following  
445 correlations: TEAC vs. NN (Additional file 1 Fig. 11-12); TEAC vs. URIC ACID  
446 (Additional file 1 Fig. 13-14), TEAC vs. PARASITEMIA (Additional file 1 Fig. 15-16),  
447 NN vs. URIC ACID (Additional file 1 Fig. 17-18), and URIC ACID vs.  
448 PARASITEMIA (Additional file 1 Fig. 19-20).



## 450 **DISCUSSION**

451 Malaria is a disease of high incidence worldwide and infection by *P. falciparum* are  
452 responsible for severe manifestations of the disease and the majority of the cases  
453 of deaths related to this disease. Cerebral malaria and pulmonary complications  
454 are among the noteworthy complications of malaria and are similar to the clinical  
455 manifestations associated with *P. berghei* infection on the animal model employed  
456 in the present study (Botelho *et al.* 1996; van der Heyde *et al.* 2000; Taylor *et al.*  
457 2006; Penet *et al.* 2007). The mechanisms that trigger the pathogeny of malaria  
458 and the appearance of severe forms are not fully elucidated yet. In this context,  
459 oxidative stress, through NO synthesis, seems to play a dubious but important role.  
460 Nevertheless, survival rate results pointed to a significant increase in the  
461 percentage of survival for the groups of mice treated with the iNOS inhibitor  
462 dexamethasone in comparison to other groups (Fig. 2), which seems to be  
463 correlated with the evolution of parasitemia in these animals, which has changed  
464 very little in this group and remained, from the 5<sup>th</sup> day henceforth significantly lower  
465 than the other groups (Fig. 1).

466 It is important to highlight that dexamethasone is a non-steroid anti-inflammatory  
467 drug that acts through iNOS mRNA synthesis inhibition (Korhonen *et al.* 2002). In  
468 this sense, it is possible that NO acts oxidatively, both inducing the worsening of  
469 the disease, as favoring the increasing of parasitemia.

470 Therefore, the effect of dexamethasone on the evolution of the parasitemia can  
471 promote inhibition of oxidative stress, as may be suggested by the existence of a  
472 negative correlation between TBARS and PARASITEMIA found only for the  
473 animals of group dexamethasone (Additional file Fig. 1). In the same way, the

474 effect of L-arginine is consistent with the effect found in this correlation for the  
475 animals of Group L-ARGININE, where there is the reversal of this pattern,  
476 presenting positive values of correlation.

477 Contrary to that mentioned by some authors (Yeo *et al.* 2007, 2008;  
478 Dhangadamajhi *et al.* 2009; Planche *et al.* 2010; Cabrales *et al.* 2011) that attribute  
479 a protective role to nitric oxide in malaria, mice treated with L-arginine remained  
480 with percentage of parasitemia and survival rate comparable to group CONTROL  
481 (Fig.1-2), suggesting that NO synthesis is not involved among the initial  
482 mechanisms of host defense and, therefore, may not contribute to the elimination  
483 of parasites. However, the mentioned studies have measured the survival rate of  
484 animals treated with Dipropylene triamine NONOate, a natural donor of nitric oxide,  
485 active in acid PH (common in malaria) whose action, unlike L-arginine, is  
486 independent of enzyme activation.

#### 487 **Pulmonary findings**

488 The mechanisms responsible for triggering the syndrome of respiratory anxiety  
489 displayed in malaria patients are multifactorial. However, according to some  
490 authors there are no doubts about the participation of free radicals (Gachot *et al.*  
491 1995; Taylor *et al.* 2006; Gillrie *et al.* 2007), which directly affect the cell  
492 membranes, attacking the endothelium and changing vascular permeability.

493 Among the free radicals involved in this process, NO seems to play an important  
494 role. However, the paradox of the actuation of this molecule in pulmonary  
495 complications is evident: while some authors suggest that the inhalation of this gas  
496 is a potential treatment of these complications (Rabkin *et al.* 2001; Schreiber *et al.*  
497 2003; McClintock *et al.* 2007; ter Horst *et al.* 2007), others blame nitric oxide

498 synthesis as responsible for causing the respiratory distress syndrome (Adhikari *et*  
499 *al.* 2007), in particular as a result of the activation of iNOS (Mikawa *et al.* 2003;  
500 Baron *et al.* 2004).

501 Additionally, superoxide radical, stimulated by substances derived from the  
502 inflammatory process, such as TNF- $\alpha$ , IL-1 $\alpha$  and lipopolysaccharide (through the  
503 increase on NADPH-oxidase activity), are also present in the syndrome, which also  
504 seems to be related with the increase of nitric oxide synthesis (Muzaffar *et al.*  
505 2003). However, the reaction between these two free radicals (nitric oxide and  
506 superoxide) is known to produce a potent third free radical, peroxynitrite (Katzung  
507 and Trevor 2017). Thus, nitric oxide seems to play a fundamental role, once that  
508 iNOS activation is associated with the induction of NADPH-oxidase and the  
509 production of peroxynitrite (Muzaffar *et al.* 2003; Adhikari *et al.* 2007).

510 As a defense mechanism against the cellular damage caused by oxidative stress,  
511 there is an increase in the production of antioxidant molecules both from alveolar  
512 surfactant production (which is notoriously hyper secreted), as well as by the  
513 increase in antioxidant enzyme activity (Rahman and MacNee 2000; Oury *et al.*  
514 2002; Christofidou-Solomidou *et al.* 2003; Kinsella *et al.* 2005; Saxena *et al.* 2005;  
515 Bein *et al.* 2009).

516 In the present study there was no significant variation in the dosages of TEAC and  
517 TBARS levels in the control group along the infection period (Fig. 3-4). However, it  
518 was observed the occurrence of a positive correlation between these parameters  
519 for both samples tested (Additional file Fig. 7-8), suggesting that the increase in  
520 oxidative stress resulting from the infection induced the increase of antioxidant  
521 defenses, but could not be reversed by it.

522 Additionally, the behavior of the TBARS vs. TEAC correlations and TBARS vs. Uric  
523 acid was similar (Additional file Fig. 3-4), suggesting that uric acid is an important  
524 component of the antioxidant defense of these animals, or IRS is associated with  
525 the infection. In this sense, the absence of correlation between these parameters  
526 found in Group L-ARGININE for both samples is further evidence of the absence of  
527 the IRS in animals in this group, probably as a result of vasodynamic effects  
528 attributable to NO.

529 Among the treatments, the only one that showed significant correlation between  
530 TBARS and PARASITEMIA, was dexamethasone ( $r=-0.29$ ,  $p=0.026$ ; Additional file  
531 Fig. 1) and can suggest that the selective inhibition of iNOS, associated to the anti-  
532 inflammatory potential of dexamethasone, decrease the lipid peroxidation even  
533 with the increase of parasitemia. This suggestion is reinforced by the finding of  
534 negative correlations between TEAC vs. PARASITEMIA and URIC ACID vs.  
535 PARASITEMIA (Additional file Fig.15 and 19), since enzymatic antioxidant  
536 defenses and IRS suffer direct influence of lipid peroxidation.

537 In this experimental model, considering that all animals were exposed to the same  
538 food supply, high values of uric acid indicate the existence of ischemia and  
539 reperfusion syndrome (Halliwell and Gutteridge 2015), and may be caused by the  
540 decrease of the caliber of blood vessels, by anemia, or by obstruction of the blood  
541 flow by the occurrence of cytoadherence.

542 It was found that a significant positive correlation for URIC ACID and TBARS levels  
543 in both samples and for both groups CONTROL and DEXAMETHASONE,  
544 suggesting that IRS arises from the increased oxidative stress in these animals as  
545 a consequence of disease progression, as well as that NO synthesis may not exert

546 important effect in this case. On the other hand, for group L-ARGININE, in both  
547 samples, the values of the coefficient of correlation approached zero, suggesting  
548 adequate blood supply to these tissues, possibly as a result of NO-attributable  
549 vasodilation.

550 The treatment with L-arginine did not promote any modification in the antioxidant  
551 capacity during the period studied (Fig. 3). On the other hand, it has significantly  
552 increased lipid peroxidation, but only in the first day of infection (Fig. 4A). The  
553 decrease in lipid peroxidation in subsequent days can be explained by the  
554 decrease in the IRS, justified by the low levels of uric acid for animals of this group  
555 during the entire period of infection (Fig. 6A).

556 The high correlations (moderate to strong) for TEAC vs. URIC ACID in all groups  
557 (Additional file Fig. 13) arises from the simple fact that uric acid, by itself, is an  
558 antioxidant, in addition of being a marker of IRS. The same is true for the positive  
559 correlations between TEAC vs. NN (Additional file Fig.11) and NN vs. URIC ACID  
560 (Additional file Fig. 17), displayed by most of the groups.

561 Among the most unusual results, it is noteworthy the absence of differences in the  
562 levels of pulmonary nitrites and nitrates, independent of the use of inhibitor  
563 (dexamethasone) or stimulator of their synthesis (L-arginine; Fig. 5A). The possible  
564 explanations for such phenomena arising out of compensatory physiological  
565 effects, such as vasoconstriction caused by the NOS inhibition, which seems to  
566 stimulate the production of mediators that cause vasodilation such as acetylcholine  
567 and bradykinin, which are bronchoconstrictors nonetheless (Silverthorn 2010).  
568 Conversely, it is possible that pulmonary hypertension on malaria, reported by  
569 Lacerda *et al.* (2009), as caused by the inhibition of NO by treatment with



570 dexamethasone, along with the need of oxygen as a result of hemolysis, stimulates  
571 the synthesis of eNOS, which increases the expression of eNOS receptors in the  
572 lungs (Beleslin-Čoki *et al.* 2011).

573 The opposite effect happened for group L-ARGININE, in which it was expected an  
574 increase in nitrites and nitrates, but despite the lack of statistical significance, stood  
575 numerically below of the other two groups. It is worth mentioning that after formed,  
576 L-arginine can follow two paths: the formation of ornithine and urea (action of  
577 arginase) or the formation of citrulline and NO (action of NOS). Additionally,  
578 interleukins (IL) 13 and 14 act over arginase directing L-arginine to the synthesis of  
579 ornithine that is converted, by the action of an aminotransferase, to proline. This  
580 route has fibrogenic role, since proline is an essential amino acid in collagen (Lee  
581 *et al.* 2001). On the other hand, cytokines interferon  $\gamma$  (IFN- $\gamma$ ), tumor necrosis  
582 factor- $\alpha$  (TNF- $\alpha$ ) and IL-12, optimize the formation of NO and citrulline from the  
583 action of iNOS over L-arginine (Hesse *et al.* 2000). Thus, it is likely that the excess  
584 of L-arginine, depending on the profile of cellular response stimulated, follow the  
585 arginase route, promoting the clearance of pulmonary nitrites and nitrates (Modolell  
586 *et al.* 1995; Chiamonte *et al.* 1999; Hesse *et al.* 2000; Lee *et al.* 2001), resulting  
587 in fibrinogen synthesis, in an attempt to revert pulmonary damage caused by  
588 oxidative stress.

589 Another possibility is that the vasodilation produced by NO excess increase  
590 availability of O<sub>2</sub>, substrate of NADPH oxidase, resulting in greater production of  
591 superoxide radical and, consequently, of peroxynitrite (Muzaffar *et al.* 2003;  
592 Adhikari *et al.* 2007). According to Wedgwood *et al.* (2012), peroxynitrite levels

593 impose a negative feed-back on NOS, i.e., the more peroxynitrite is synthesized,  
594 greater inhibition of NOS.

595 Additionally, the absence of differences between the groups for the values of  
596 pulmonary NN may be the result of the existence of a complex system of non-  
597 adrenergic non-cholinergic (NANC) neural fibers in the lungs of mammals, capable  
598 of producing large quantities of NO (Gaston *et al.* 1994) and, therefore, to masque  
599 NO levels arising from malaria in this tissue. This suggestion is reinforced by the  
600 absence of correlation between NN and TBARS levels in all groups for lung  
601 samples (Additional file Fig. 5). In contrast, for brain samples, both groups  
602 CONTROL and DEXAMETHASONE showed significant positive correlations, while  
603 group L-ARGININE showed no correlation between these parameters (Additional  
604 file Fig. 6). These data suggest that, at least partially, oxidative stress associated  
605 with the development of the disease is derived from the production of NO, as  
606 pointed out by several authors, in addition to the participation of IRS (Percário *et al.*  
607 2012), which may have been reversed in the animals treated with L-arginine, due  
608 to its vasodilator effect.

### 609 **Cerebral findings**

610 Similar to the pulmonary features of the disease, cerebral edema seems to  
611 determine the pathological onset of severe malaria. However, the increase of  
612 intracranial pressure due to cerebral edema results in greater risk of death. This  
613 abnormality is originated from a set of factors that, despite the apparently  
614 derangement, act in order to eliminate infection even without the passage of the  
615 microorganism to the cerebral tissue.

616 In this context, NO acts as a key molecule in brain infections. However, it is still  
617 unknown if the major problem arises from insufficient concentrations of NO acting  
618 directly in the elimination of the parasite, and for this reason, by selecting more  
619 resistant strains of the parasite (Gramaglia *et al.* 2006), or if the high  
620 concentrations of NO, produced as a result of infection by the protozoan parasite,  
621 are responsible for the cerebral edema (Favre *et al.* 1999; Maneerat *et al.* 2000).

622 In the evaluation of brain oxidative parameters, it was noted an increase in lipid  
623 peroxidation for mice treated with dexamethasone in relation to the other groups,  
624 mainly in first day post-infection. Nevertheless, the opposite happens with the  
625 group of mice treated with L-arginine, where TBARS levels are significantly lower  
626 than the other groups (Fig. 4B).

627 The elevation of TBARS levels for the group treated with dexamethasone may  
628 result from a technical artifact, as brain tissue is rich in cholesterol and the drug  
629 may form cholesterol hydroperoxides, which may react with thiobarbituric acid,  
630 greatly increasing the absorbance of brain samples (Lima and Abdalla 2001). A  
631 finding that may corroborate this statement are the dosages of TEAC that do not  
632 change in the first days of study for all groups (Fig. 3B). The possibility that lipid  
633 peroxidation occurs in this initial period by an increase in IRS was eliminated since  
634 uric acid values for this group of animals are similar to those of the other groups  
635 until the tenth day of infection (Fig. 6B).

636 Notwithstanding, it seems that the oxidative effect of nitric oxide was overcome by  
637 its vasodilator effect, since the production of uric acid in mice treated with L-  
638 arginine was significantly lower when compared to other groups (Fig. 6B), notably  
639 from the 10<sup>th</sup> day of infection. However, the probable vasodilation presented by

640 group L-ARGININE caused no changes on the survival rate of these animals (Fig.  
641 2).

642 The re-establishment of antioxidant capacity can be decisive for the survival of  
643 mice infected with *P. berghei*. The antioxidant capacity decreases significantly in all  
644 tested groups. However, only for group DEXAMETHASONE this antioxidant  
645 capacity is significantly reversed from the 10<sup>th</sup> day (Fig. 3B), reinforcing the idea of  
646 Favre *et al.* (1999) and Maneerat *et al.* (2000) that the oxidative stress induced by  
647 nitric oxide in cerebral microenvironment contributes to the severity of the disease.  
648 Another point that deserves to be highlighted for the group treated with  
649 dexamethasone is that, despite the inhibition of iNOS, there was only significant  
650 increase in serum uric acid concentration from the 15<sup>th</sup> day (Fig. 6B), signaling that  
651 the beginning of IRS coincides with the starting point of deaths in this group. The  
652 finding of positive correlation between TBARS and NN for group  
653 DEXAMETHASONE corroborates this observation (Additional file Fig. 6).

654 A factor that may have contributed significantly to the late start of the IRS in this  
655 group is the inhibition of the inflammatory process, which is necessary for the  
656 occurrence of cytoadherence (Ferreira *et al.* 2004; Pettersson *et al.* 2005).  
657 Additionally, this is the only group that displays significant positive correlation  
658 between URIC ACID and PARASITEMIA (Additional file Fig. 20), reinforcing the  
659 idea that IRS occurs on a temporal scale.

660 The absence of correlation between NN and PARASITEMIA for all groups and both  
661 samples strongly suggests that NO levels do not influence the evolution of  
662 parasitemia (Additional file Fig. 9-10).

663 Considering the different treatments administered, the more promising results were  
664 seen with the dexamethasone treatment, since animals exhibited significantly  
665 higher survival rate and decreased progression of parasitemia when compared to  
666 the other groups. These data suggest that selective inhibition of iNOS, associated  
667 to the anti-inflammatory potential of dexamethasone, might decreased lipid  
668 peroxidation even with the increase of parasitemia.

669 In contrast, administration of L-arginine, regardless not significant modification in  
670 NN concentrations, promoted vasodilation in both organs, proven by an increase in  
671 the concentrations of uric acid, with no effect over the survival rate of these  
672 animals.

673 Nevertheless, the cerebral oxidative changes promoted by the administration of  
674 dexamethasone were somehow different from the ones presented by other groups.  
675 The re-establishment of the cerebral antioxidant capacity after the 10<sup>th</sup> day of  
676 infection is noteworthy, suggesting the participation of oxidative stress in brain as a  
677 result of plasmodial infection, as well as the inhibition of brain NO synthesis, which  
678 promoted survival rate of almost 90% of the animals until the 15<sup>th</sup> day of infection,  
679 with possible direct interference of ischemia and reperfusion syndrome, as seen by  
680 increased levels of uric acid.

## 681 **CONCLUSION**

682 Lately, the role of NO in the physiopathogenesis of malaria has been extensively  
683 studied. Nevertheless, its precise involvement in the underlying mechanisms of the  
684 disease is still controversial. The present study presents the inhibitory effects of  
685 dexamethasone on brain nitric oxide synthesis and its relationship to increased

686 survival in the mice model of malaria. To our best knowledge, it is the first time  
687 such results are reported in the scientific literature.

688 Data of the present study showed that iNOS inhibition by dexamethasone  
689 promoted an increase in the survival rate of *P. berghei* -infected animals until the  
690 point at which it compromised the functioning of the cerebral microcirculation.

691 Indeed, iNOS inhibition by dexamethasone seems to have stimulated a series of  
692 redox effects that, if compensatory hyper stimulated, may be responsible for the  
693 worsening of the pulmonary symptoms.

694

695 **COMPETING INTERESTS**

696 The authors declare that they have no competing interests.

697 **FUNDING**

698 National Counsel of Technological and Scientific Development – CNPq (Brazil) for  
699 scholarship (DRM).

700 **AUTHOS' CONTRIBUTION**

701 SP, MDG and MFD were responsible for the design of the study, data analysis,  
702 and for the critical revision of the text. DRM, ARQG, ACMGU, MESF, RSS and  
703 JRSV were responsible for the collection of data, statistical study and drafting of  
704 the manuscript.

705 **REFERENCES**

706 Adhikari NK, Burns KE, Friedrich JO, Granton JT, Cook DJ and Meade MO (2007)  
707 Effect of nitric oxide on oxygenation and mortality in acute lung injury: systematic  
708 review and meta-analysis. *British Medical Association* 334(7597), 779. doi:  
709 10.1136/bmj.39139.716794.55.

710 Barnes PJ, Adcock I, Spedding M and Vanhoutte PM (1993) Anti-inflammatory  
711 actions of steroids: molecular mechanisms. *Trends in pharmacological*  
712 *sciences* 14(12), 436-441. doi: 10.1016/0165-6147(93)90184-L.

713 Baron RM, Carvajal IM, Fredenburgh LE, Liu X, Porrata Y, Cullivan ML and  
714 Perrella MA (2004) Nitric oxide synthase-2 down-regulates surfactant protein-B  
715 expression and enhances endotoxin-induced lung injury in mice. *The FASEB*  
716 *Journal* 18(11), 1276-1278. doi: 10.1096/fj.04-1518fje.

717 Becker K, Tilley L, Vennerstrom JL, Roberts D, Rogerson S and Ginsburg H (2004)  
718 Oxidative stress in malaria parasite-infected erythrocytes: host–parasite  
719 interactions. *International Journal for Parasitology* 34(2), 163-189. doi:  
720 10.1016/j.ijpara.2003.09.011.

721 Bein K, Wesselkamper SC, Liu X, Dietsch M, Majumder N, Concel VJ and  
722 Borchers MT (2009) Surfactant-associated protein B is critical to survival in nickel-  
723 induced injury in mice. *American Journal of Respiratory Cell and Molecular*  
724 *Biology* 41(2), 226-236. doi: 10.1165/rcmb.2008-0317OC.

725 Beleslin-Čokić BB, Čokić VP, Wang L, Píknova B, Teng R, Schechter NA and  
726 Noguchi CT (2011) Erythropoietin and hypoxia increase erythropoietin receptor  
727 and nitric oxide levels in lung microvascular endothelial cells. *Cytokine* 54(2), 129-  
728 135. doi: 10.1016/j.cyto.2011.01.015.

- 729 Botelho C, Silva COS, Beppu OS, Bogossian M and Vargaftig BB (1996) Edema  
730 pulmonar na malária: modulação pela cetirizina / Pulmonary edema in murine  
731 malaria: modulation by cetirizine. *Jornal Brasileiro de Pneumologia* 22(2):69-76.
- 732 Brinkmann V, Kaufmann SH, Simon MM and Fischer H (1984) Role of  
733 macrophages in malaria: O<sub>2</sub> metabolite production and phagocytosis by splenic  
734 macrophages during lethal *Plasmodium berghei* and self-limiting *Plasmodium yoelii*  
735 infection in mice. *Infection and Immunity* 44(3), 743-746.
- 736 Cabrales P, Zanini GM, Meays D, Frangos JÁ and Carvalho LJ (2011) Nitric oxide  
737 protection against murine cerebral malaria is associated with improved cerebral  
738 microcirculatory physiology. *Journal of Infectious Diseases* 203(10), 1454-1463.  
739 doi: 10.1093/infdis/jir058.
- 740 Chatterjee S, Premachandran S, Shukla J and Poduval TB (2007) Synergistic  
741 therapeutic potential of dexamethasone and L-arginine in lipopolysaccharide-  
742 induced septic shock. *Journal of Surgical Research* 140(1), 99-108. doi:  
743 10.1016/j.jss.2006.09.002.
- 744 Chiaramonte MG, Donaldson DD, Cheever AW and Wynn TA (1999) An IL-13  
745 inhibitor blocks the development of hepatic fibrosis during a T-helper type 2-  
746 dominated inflammatory response. *The Journal of Clinical Investigation* 104(6),  
747 777-785. doi: 10.1172/JCI7325.
- 748 Chiwakata CB, Hemmer CJ and Dietrich M (2000) High levels of inducible nitric  
749 oxide synthase mRNA are associated with increased monocyte counts in blood  
750 and have a beneficial role in *Plasmodium falciparum* malaria. *Infection and*  
751 *Immunity* 68(1), 394-399. doi: 10.1128/IAI.68.1.394-399.2000.
- 752 Christofidou-Solomidou M, Scherpereel A, Wiewrodt R, Ng K, Sweitzer T, Arguiri E  
753 and Muzykantov VR (2003) PECAM-directed delivery of catalase to endothelium  
754 protects against pulmonary vascular oxidative stress. *American Journal of*  
755 *Physiology - Lung Cellular and Molecular Physiology* 285(2), L283-L292. doi:  
756 10.1152/ajplung.00021.2003.
- 757 Cox F (2002) History of human parasitology. *Clinical Microbiology Reviews*  
758 15:595–612. doi: 10.1128/CMR.15.4.595-612.2002.
- 759 De Vera ME, Taylor BS, Wang QI, Shapiro RA, Billiar TR and Geller DA (1997)  
760 Dexamethasone suppresses iNOS gene expression by upregulating I-κBα and  
761 inhibiting NF-κB. *American Journal of Physiology - Gastrointestinal and Liver*  
762 *Physiology* 273(6), G1290-G1296. doi: 10.1152/ajpgi.1997.273.6.G1290.
- 763 Dell RB, Holleran S, Ramakrishnan R (2002) Sample size determination. *Institute*  
764 *of Laboratory Animal Resources Journal* 43(4):207-13. doi: 10.1093/ilar.43.4.207.
- 765 Dey S, Guha M, Alam A, Goyal M, Bindu S, Pal C and Bandyopadhyay U (2009)  
766 Malarial infection develops mitochondrial pathology and mitochondrial oxidative  
767 stress to promote hepatocyte apoptosis. *Free Radical Biology and Medicine* 46(2),  
768 271-281. doi: 10.1016/j.freeradbiomed.2008.10.032.



- 769 Dhangadamajhi G, Mohapatra BN, Kar SK and Ranjit M (2009) Endothelial nitric  
770 oxide synthase gene polymorphisms and *Plasmodium falciparum* infection in  
771 Indian adults. *Infection and Immunity* 77(7), 2943-2947. doi: 10.1128/IAI.00083-09.
- 772 Di Rosa M, Radomski M, Carnuccio R and Moncada S (1990) Glucocorticoids  
773 inhibit the induction of nitric oxide synthase in macrophages. *Biochemical and*  
774 *Biophysical Research Communications* 172(3), 1246-1252.
- 775 Dondorp AM, Omodeo-Salé F, Chotivanich K, Taramelli D and White NJ (2003)  
776 Oxidative stress and rheology in severe malaria. *Redox report* 8(5), 292-294. doi:  
777 10.1179/135100003225002934.
- 778 Farombi EO, Shyntum YY and Emerole GO (2003) Influence of chloroquine  
779 treatment and *Plasmodium falciparum* malaria infection on some enzymatic and  
780 non-enzymatic antioxidant defense indices in humans. *Drug and Chemical*  
781 *Toxicology* 26(1), 59-71. doi: 10.1081/DCT-120017558.
- 782 Favre N, Ryffel B and Rudin W (1999) The development of murine cerebral malaria  
783 does not require nitric oxide production. *Parasitology* 118(2), 135-138. doi:  
784 10.1016/S1286-4579(99)80513-9.
- 785 Ferreira MU, da Silva Nunes M and Wunderlich G (2004) Antigenic diversity and  
786 immune evasion by malaria parasites. *Clinical and Diagnostic Laboratory*  
787 *Immunology* 11(6), 987-995. doi: 10.1128/CDLI.11.6.987-995.2004.
- 788 Förstermann U and Sessa WC (2012) Nitric oxide synthases: regulation and  
789 function. *European Heart Journal* 33(7), 829-837. doi: 10.1093/eurheartj/ehr304.
- 790 Gachot B, Wolff M, Nissack G, Veber B and Vachon F (1995) Acute lung injury  
791 complicating imported *Plasmodium falciparum* malaria. *Chest* 108(3), 746-749. doi:  
792 10.1378/chest.108.3.746.
- 793 Gaston B, Drazen JM, Loscalzo J and Stamler JS (1994) The biology of nitrogen  
794 oxides in the airways. *American Journal of Respiratory and Critical Care*  
795 *Medicine* 149(2), 538-551. doi: 10.1164/ajrccm.149.2.7508323.
- 796 Geller DA, Freeswick PD, Nguyen D, Nussler AK, Di Silvio M, Shapiro RA and  
797 Billiar TR (1994) Differential induction of nitric oxide synthase in hepatocytes during  
798 endotoxemia and the acute-phase response. *Archives of Surgery* 129(2), 165-171.  
799 doi: 10.1001/archsurg.1994.01420260061008.
- 800 Gilbert RS and Herschman HR (1993) "Macrophage" nitric oxide synthase is a  
801 glucocorticoid-inhibitable primary response gene in 3T3 cells. *Journal of Cellular*  
802 *Physiology* 157(1), 128-132. doi: 10.1002/jcp.1041570117.
- 803 Gillrie MR, Krishnegowda G, Lee K, Buret AG, Robbins SM, Looareesuwan S and  
804 Ho M (2007) Src-family kinase-dependent disruption of endothelial barrier function  
805 by *Plasmodium falciparum* merozoite proteins. *Blood* 110(9), 3426-3435. doi:  
806 10.1182/blood-2007-04-084582.
- 807 Gomes BAQ, da Silva LF, Gomes ARQ, Moreira DR, Dolabela MF, Santos RS and  
808 Percário S (2015) N-acetyl cysteine and mushroom *Agaricus sylvaticus*

- 809 supplementation decreased parasitaemia and pulmonary oxidative stress in a mice  
810 model of malaria. *Malaria Journal* 14(1), 202. doi: 10.1186/s12936-015-0717-0.
- 811 Gramaglia I, Sobolewski P, Meays D, Contreras R, Nolan JP, Frangos JA and Van  
812 Der Heyde HC (2006) Low nitric oxide bioavailability contributes to the genesis of  
813 experimental cerebral malaria. *Nature Medicine* 12(12), 1417. doi:  
814 10.1038/nm1499.
- 815 Halliwell B and Gutteridge JM (2015) *Free radicals in biology and medicine*. 5ed.  
816 Oxford University Press, USA.
- 817 Herrera-Ortíz A, Lanz-Mendoza H, Martínez-Barnetche J, Hernández-Martínez S,  
818 Villarreal-Treviño C, Aguilar-Marcelino L and Rodríguez MH (2004) *Plasmodium*  
819 *berghei* ookinetes induce nitric oxide production in *Anopheles pseudopunctipennis*  
820 midguts cultured in vitro. *Insect Biochemistry and Molecular Biology* 34(9), 893-  
821 901. doi: 10.1016/j.ibmb.2004.05.007.
- 822 Hesse M, Cheever AW, Jankovic D and Wynn TA (2000) NOS-2 mediates the  
823 protective anti-inflammatory and antifibrotic effects of the Th1-inducing adjuvant,  
824 IL-12, in a Th2 model of granulomatous disease. *The American Journal of*  
825 *Pathology* 157(3), 945-955. doi: 10.1016/S0002-9440(10)64607-X.
- 826 Huber SM, Uhlemann AC, Gamper NL, Duranton C, Kremsner PG and Lang F  
827 (2002) *Plasmodium falciparum* activates endogenous Cl<sup>-</sup> channels of human  
828 erythrocytes by membrane oxidation. *The EMBO Journal* 21(1-2), 22-30. doi:  
829 10.1093/emboj/21.1.22.
- 830 Jaramillo M, Godbout M and Olivier M (2005) Hemozoin induces macrophage  
831 chemokine expression through oxidative stress-dependent and-independent  
832 mechanisms. *The Journal of Immunology* 174(1), 475-484. doi:  
833 10.4049/jimmunol.174.1.475.
- 834 Jaramillo M, Gowda DC, Radzioch D and Olivier M (2003) Hemozoin increases  
835 IFN- $\gamma$ -inducible macrophage nitric oxide generation through extracellular signal-  
836 regulated kinase-and NF- $\kappa$ B dependent pathways. *The Journal of Immunology*  
837 171(8), 4243-4253. doi: 10.4049/jimmunol.171.8.4243.
- 838 Katzung BG and Trevor AJ (2017). *Farmacologia Básica e Clínica*. 13ed. McGraw  
839 Hill, Brasil.
- 840 Keller CC, Kremsner PG, Hittner JB, Misukonis MA, Weinberg JB and Perkins DJ  
841 (2004) Elevated nitric oxide production in children with malarial anemia: hemozoin-  
842 induced nitric oxide synthase type 2 transcripts and nitric oxide in blood  
843 mononuclear cells. *Infection and Immunity* 72(8), 4868-4873. doi:  
844 10.1128/IAI.72.8.4868-4873.2004.
- 845 Kinsella JP, Parker TA, Davis JM and Abman SH (2005) Superoxide dismutase  
846 improves gas exchange and pulmonary hemodynamics in premature  
847 lambs. *American Journal of Respiratory and Critical Care Medicine* 172(6), 745-  
848 749. doi: 10.1164/rccm.200501-146OC.

- 849 Kleinert H, Pautz A, Linker K and Schwarz PM (2004) Regulation of the expression  
850 of inducible nitric oxide synthase. *European Journal of Pharmacology* 500(1-3),  
851 255-266. doi: 10.1016/j.ejphar.2004.07.030.
- 852 Kohn HI and Liversedge M (1944) On a new aerobic metabolite whose production  
853 by brain is inhibited by apomorphine, emetine, ergotamine, epinephrine, and  
854 menadione. *Journal of Pharmacology and Experimental Therapeutics* 82(3), 292-  
855 300.
- 856 Korhonen R, Lahti A, Hämäläinen M, Kankaanranta H and Moilanen E (2002)  
857 Dexamethasone inhibits inducible nitric-oxide synthase expression and nitric oxide  
858 production by destabilizing mRNA in lipopolysaccharide-treated  
859 macrophages. *Molecular Pharmacology* 62(3), 698-704. doi:  
860 10.1124/mol.62.3.698.
- 861 Kumar S and Bandyopadhyay U (2005) Free heme toxicity and its detoxification  
862 systems in human. *Toxicology Letters* 157(3), 175-188. doi:  
863 10.1016/j.toxlet.2005.03.004.
- 864 Lacerda MVGD, Mourão MPG, Santos PJTD and Alecrim MDGC (2009) Algida  
865 malaria: a syndromic diagnosis. *Revista da Sociedade Brasileira de Medicina*  
866 *Tropical* 42(1), 79-81.
- 867 Lee CG, Homer RJ, Zhu Z, Lanone S, Wang X, Koteliensky V and Senior RM  
868 (2001) Interleukin-13 induces tissue fibrosis by selectively stimulating and  
869 activating transforming growth factor  $\beta$ 1. *Journal of Experimental Medicine* 194(6),  
870 809-822. doi: 10.1084/jem.194.6.809.
- 871 Lima ES and Abdalla DSP (2001) Peroxidação lipídica: mecanismos e avaliação  
872 em amostras biológicas/ Lipid Peroxidation: Mechanisms and evaluation in  
873 biological samples. *Brazilian Journal of Pharmaceutical Sciences* 37(3), 293-303.
- 874 Luse SA and Miller LH (1971) *Plasmodium falciparum* malaria. *The American*  
875 *Journal of Tropical Medicine and Hygiene* 20(5), 655-660. doi:  
876 10.4269/ajtmh.1971.20.655.
- 877 Maneerat Y, Viriyavejakul P, Punpoowong B, Jones M, Wilairatana P, Pongponratn  
878 E and Udomsangpetch R (2000) Inducible nitric oxide synthase expression is  
879 increased in the brain in fatal cerebral malaria. *Histopathology* 37(3), 269-277. doi:  
880 10.1046/j.1365-2559.2000.00989.x.
- 881 McClintock DE, Ware LB, Eisner MD, Wickersham N, Thompson BT and Matthay  
882 MA (2007) Higher urine nitric oxide is associated with improved outcomes in  
883 patients with acute lung injury. *American Journal of Respiratory and Critical Care*  
884 *Medicine* 175(3), 256-262. doi:10.1164/rccm.200607-947OC.
- 885 Mikawa K, Nishina K, Takao Y and Obara H (2003) ONO-1714, a nitric oxide  
886 synthase inhibitor, attenuates endotoxin-induced acute lung injury in rabbits.  
887 *Anesthesia & Analgesia* 97(6), 1751-1755.  
888 doi:10.1213/01.ANE.0000086896.90343.13.
- 889 Miller NJ, Rice-Evans C, Davies MJ, Gopinathan V and Milner A (1993) A novel  
890 method for measuring antioxidant capacity and its application to monitoring the

- 891 antioxidant status in premature neonates. *Clinical Science* 84(4), 407-412. doi:  
892 10.1042/cs0840407.
- 893 Modolell M, Corraliza IM, Link F, Soler G and Eichmann K (1995) Reciprocal  
894 regulation of the nitric oxide synthase/arginase balance in mouse bone marrow-  
895 derived macrophages by TH 1 and TH 2 cytokines. *European Journal of*  
896 *Immunology* 25(4), 1101-1104. doi: 10.1002/eji.1830250436.
- 897 Muzaffar S, Jeremy JY, Angelini GD, Stuart-Smith K and Shukla N (2003) Role of  
898 the endothelium and nitric oxide synthases in modulating superoxide formation  
899 induced by endotoxin and cytokines in porcine pulmonary arteries. *Thorax* 58(7),  
900 598-604. doi:10.1136/thorax.58.7.598.
- 901 Nahrevanian H and Dascombe MJ (2006) Simultaneous increases in immune-  
902 competent cells and nitric oxide in the spleen during *Plasmodium berghei* infection  
903 in mice. *Journal of Microbiology Immunology and Infection*, 39(1), 11.
- 904 Narsaria N, Mohanty C, Das BK, Mishra SP and Prasad R (2012) Oxidative stress  
905 in children with severe malaria. *Journal of Tropical Pediatrics* 58(2), 147-150. doi:  
906 10.1093/tropej/fmr043.
- 907 Neill AL and Hunt NH (1995) Effects of endotoxin and dexamethasone on cerebral  
908 malaria in mice. *Parasitology* 111(pt4), 443-454.
- 909 Omodeo-Salé F, Motti A, Basilico N, Parapini S, Oliaro P and Taramelli D (2003)  
910 Accelerated senescence of human erythrocytes cultured with *Plasmodium*  
911 *falciparum*. *Blood* 102(2),705-711. doi: 10.1182/blood-2002-08-2437
- 912 Otto TD, Böhme U, Jackson AP, Hunt M, Franke-Fayard B, Hoeijmakers WA and  
913 Cunningham D (2014) A comprehensive evaluation of rodent malaria parasite  
914 genomes and gene expression. *BMC Biology* 12(1), 86. doi: 10.1186/s12915-014-  
915 0086-0.
- 916 Oury TD, Schaefer LM, Fattman CL, Choi A, Weck KE and Watkins SC (2002)  
917 Depletion of pulmonary EC-SOD after exposure to hyperoxia. *American Journal of*  
918 *Physiology-Lung Cellular and Molecular Physiology* 283(4), L777-L784. doi:  
919 10.1152/ajplung.00011.2002.
- 920 Pabón A, Carmona J, Burgos LC and Blair S (2003) Oxidative stress in patients  
921 with non-complicated malaria. *Clinical Biochemistry* 36(1), 71-78. doi:  
922 10.1016/S0009-9120(02)00423-X.
- 923 Penet MF, Kober F, Confort-Gouny S, Le Fur Y, Dalmasso C, Coltel N and Viola A  
924 (2007) Magnetic resonance spectroscopy reveals an impaired brain metabolic  
925 profile in mice resistant to cerebral malaria infected with *Plasmodium berghei*  
926 ANKA. *Journal of Biological Chemistry* 282(19), 14505-14514. doi:  
927 10.1074/jbc.M608035200.
- 928 Percário S, Moreira DR, Gomes BA, Ferreira ME, Gonçalves ACM, Laurindo PS  
929 and Green MD (2012) Oxidative stress in malaria. *International Journal of*  
930 *Molecular Sciences* 13(12), 16346-16372. doi: 10.3390/ijms131216346.

- 931 Percario S, Vital ACC, Jablonka F (1994) Dosagem do  
932 malondialdeído/Malondialdehyde measurement. *NewsLab* 2(6):46-50.
- 933 Peterson TM, Gow AJ and Luckhart S (2007) Nitric oxide metabolites induced in  
934 *Anopheles stephensi* control malaria parasite infection. *Free Radical Biology and*  
935 *Medicine* 42(1), 132-142. doi: 10.1016/j.freeradbiomed.2006.10.037.
- 936 Pettersson F, Vogt AM, Jonsson C, Mok BW, Shamaei-Tousi A, Bergström S and  
937 Wahlgren M (2005) Whole-body imaging of sequestration of *Plasmodium*  
938 *falciparum* in the rat. *Infection and Immunity* 73(11), 7736-7746. doi:  
939 10.1128/IAI.73.11.7736-7746.2005
- 940 Pfeilschifter J and Schwarzenbach H (1990) Interleukin 1 and tumor necrosis factor  
941 stimulate cGMP formation in rat renal mesangial cells. *Federation of European*  
942 *Biochemical Societies Letters* 273(1-2), 185-187. doi: 10.1016/0014-  
943 5793(90)81080-8.
- 944 Planche T, Macallan DC, Sobande T, Borrmann S, Kun JF, Krishna S and  
945 Kremsner PG (2010) Nitric oxide generation in children with malaria and the  
946 NOS2G-954C promoter polymorphism. *American Journal of Physiology-*  
947 *Regulatory, Integrative and Comparative Physiology* 299(5), R1248-R1253. doi:  
948 10.1152/ajpregu.00390.2010.
- 949 Potter SM, Mitchell AJ, Cowden WB, Sanni LA, Dinauer M, De Haan JB and Hunt  
950 NH (2005) Phagocyte-derived reactive oxygen species do not influence the  
951 progression of murine blood-stage malaria infections. *Infection and Immunity* 73(8),  
952 4941-4947. doi: 10.1128/IAI.73.8.4941-4947.2005.
- 953 Rabkin DG, Sladen RN, DeMango A, Steinglass KM and Goldstein DJ (2001) Nitric  
954 oxide for the treatment of postpneumonectomy pulmonary edema. *The Annals of*  
955 *thoracic surgery* 72(1), 272-274. doi: 10.1016/S0003-4975(01)02476-6.
- 956 Radomski MW, Palmer RM and Moncada S (1990) Glucocorticoids inhibit the  
957 expression of an inducible, but not the constitutive, nitric oxide synthase in vascular  
958 endothelial cells. *Proceedings of the National Academy of Sciences* 87(24), 10043-  
959 10047.
- 960 Rahman I and MacNee W (2000) Oxidative stress and regulation of glutathione in  
961 lung inflammation. *European Respiratory Journal* 16(3), 534-554. doi:  
962 10.1034/j.1399-3003.2000.016003534.x.
- 963 Re R, Pellegrini N, Proteggente A, Pannala A, Yang M and Rice-Evans C (1999)  
964 Antioxidant activity applying an improved ABTS radical cation decolorization  
965 assay. *Free Radical Biology and Medicine* 26(9-10), 1231-1237. doi:  
966 10.1016/S0891-5849(98)00315-3.
- 967 Saefel M, Krueger A, Arriens S, Heussler V, Racz P, Fleischer B and Hoerauf A  
968 (2004) Mice deficient in interleukin-4 (IL-4) or IL-4 receptor  $\alpha$  have higher  
969 resistance to sporozoite infection with *Plasmodium berghei* (ANKA) than do naive  
970 wild-type mice. *Infection and Immunity* 72(1), 322-331. doi: 10.1128/IAI.72.1.322-  
971 331.2004.

- 972 Saxena S, Kumar R, Madan T, Gupta V, Muralidhar K and Sarma PU (2005)  
973 Association of polymorphisms in pulmonary surfactant protein A1 and A2 genes  
974 with high-altitude pulmonary edema. *Chest* 128(3), 1611-1619. doi:  
975 10.1378/chest.128.3.1611.
- 976 Sanni LA, Thomas SR, Tattam BN, Moore DE, Chaudhri G, Stocker R and Hunt  
977 NH (1998) Dramatic changes in oxidative tryptophan metabolism along the  
978 kynurenine pathway in experimental cerebral and noncerebral malaria. *American*  
979 *Journal of Pathology* 152(2), 611-619.
- 980 Schreiber MD, Gin-Mestan K, Marks JD, Huo D, Lee G and Srisuparp P (2003)  
981 Inhaled nitric oxide in premature infants with the respiratory distress  
982 syndrome. *New England Journal of Medicine* 349(22), 2099-2107. doi:  
983 10.1056/NEJMoa031154.
- 984 Silverthorn DU. Fisiologia humana: uma abordagem integrada/Human physiology:  
985 an integrated approach. 5ed. Porto Alegre: Artmed; 2010.
- 986 Skimming JW, Nasiroglu O, Huang CJ, Wood CE, Stevens BR, Haque IU and  
987 Sarcia PJ (2003) Dexamethasone suppresses iNOS yet induces GTPCH and CAT-  
988 2 mRNA expression in rat lungs. *American Journal of Physiology-Lung Cellular and*  
989 *Molecular Physiology* 285(2), L484-L491. doi: 10.1152/ajplung.00433.2002.
- 990 Sohail M, Kaul A, Raziuddin M and Adak T (2007) Decreased glutathione-S-  
991 transferase activity: Diagnostic and protective role in vivax malaria. *Clinical*  
992 *Biochemistry* 40(5-6), 377-382. doi: 10.1016/j.clinbiochem.2007.01.005.
- 993 Suresh KP (2011) An overview of randomization techniques: an unbiased  
994 assessment of outcome in clinical research. *Journal of Human Reproductive*  
995 *Sciences* 4(1), 8. doi: 10.4103/0974-1208.82352.
- 996 Syarifah HP, Hayano M and Kojima S (2003) Cytokine and chemokine responses  
997 in a cerebral malaria-susceptible or-resistant strain of mice to *Plasmodium berghei*  
998 ANKA infection: early chemokine expression in the brain. *International*  
999 *Immunology* 15(5), 633-640. doi: 10.1093/intimm/dxg065.
- 1000 Taylor WR, Cañon V and White NJ (2006) Pulmonary manifestations of malaria.  
1001 *Treatments in Respiratory Medicine* 5(6), 419-428.
- 1002 ter Horst SA, Walther FJ, Poorthuis BJ, Hiemstra PS and Wagenaar GT (2007)  
1003 Inhaled nitric oxide attenuates pulmonary inflammation and fibrin deposition and  
1004 prolongs survival in neonatal hyperoxic lung injury. *American Journal of*  
1005 *Physiology-Lung Cellular and Molecular Physiology* 293(1), L35-L44. doi:  
1006 10.1152/ajplung.00381.2006.
- 1007 Vale VV, Vilhena TC, Trindade RCS, Ferreira MRC, Percário S, Soares LF, Pereira  
1008 WLA, Brandão GC, Oliveira AB, Dolabela MF and De Vasconcelos F (2015) Anti-  
1009 malarial activity and toxicity assessment of *Himatanthus articulatus*, a plant used to  
1010 treat malaria in the Brazilian Amazon. *Malaria Journal* 14(1), 132. doi:  
1011 10.1186/s12936-015-0643-1.

- 1012 van der Heyde HC, Gu Y, Zhang Q, Sun G and Grisham MB (2000) Nitric oxide is  
1013 neither necessary nor sufficient for resolution of *Plasmodium chabaudi* malaria in  
1014 mice. *The Journal of Immunology* 165:3317-23. doi: 10.4049/jimmunol.165.6.3317.
- 1015 Walker G, Pfeilschifter J and Kunz D (1997) Mechanisms of suppression of  
1016 inducible nitric-oxide synthase (iNOS) expression in interferon (IFN)- $\gamma$ -stimulated  
1017 RAW 264.7 cells by dexamethasone: evidence for glucocorticoid-induced  
1018 degradation of iNOS protein by calpain as a key step in post-transcriptional  
1019 regulation. *Journal of Biological Chemistry* 272(26), 16679-16687. doi:  
1020 10.1074/jbc.272.26.16679.
- 1021 Wedgwood S, Lakshminrusimha S, Farrow KN, Czech L, Gugino SF, Soares F and  
1022 Steinhorn RH (2012) Apocynin improves oxygenation and increases eNOS in  
1023 persistent pulmonary hypertension of the newborn. *American Journal of  
1024 Physiology-Lung Cellular and Molecular Physiology* 302(6), L616-L626. doi:  
1025 10.1152/ajplung.00064.2011.
- 1026 Wilmanski J, Siddiqi M, Deitch EA and Spolarics Z (2005) Augmented IL-10  
1027 production and redox-dependent signaling pathways in glucose-6-phosphate  
1028 dehydrogenase-deficient mouse peritoneal macrophages. *Journal of leukocyte  
1029 biology* 78(1), 85. doi: 10.1189/jlb.0105010.
- 1030 World Health Organization. WHO Global Malaria Program. World Malaria Report  
1031 2017. <https://www.who.int/malaria/publications/world-malaria-report-2017/en/>.  
1032 Accessed 08 December 2018.
- 1033 World Health Organization. WHO Global Malaria Program. World Malaria Report  
1034 2014. [http://www.who.int/malaria/publications/world\\_malaria\\_report\\_2014/en/](http://www.who.int/malaria/publications/world_malaria_report_2014/en/).  
1035 Accessed 16 December 2015.
- 1036 World Health Organization. WHO Global Malaria Program. World Malaria Report  
1037 2011. <http://www.who.int/malaria/publications/atoz/978924156>. Accessed 21 March  
1038 2013.
- 1039 Yazar S, Kilic E, Saraymen R and Ozbilge H (2004) Serum malondialdehyde levels  
1040 in patients infected with *Plasmodium vivax*. *The West Indian Medical Journal* 53(3),  
1041 147-149.
- 1042 Yeo TW, Lampah DA, Gitawati R, Tjitra E, Kenangalem E, McNeil YR and Price  
1043 RN (2007) Impaired nitric oxide bioavailability and L-arginine-reversible endothelial  
1044 dysfunction in adults with falciparum malaria. *Journal of Experimental Medicine*  
1045 204(11), 2693-2704. doi: 10.1084/jem.20070819.
- 1046 Yeo TW, Lampah DA, Gitawati R, Tjitra E, Kenangalem E, Piera K and Anstey NM  
1047 (2008) Angiopoietin-2 is associated with decreased endothelial nitric oxide and  
1048 poor clinical outcome in severe falciparum malaria. *Proceedings of the National  
1049 Academy of Sciences* 105(44), 17097-17102. doi: 10.1073/pnas.0805782105.

1050 **FIGURE LEGENDS**

1051 **Figure 1** – Progression of parasitemia in *Plasmodium berghei*-infected Swiss mice.  
1052 Animals were pre-treated and received a daily dose of DEXAMETHASONE, L-ARGININE,  
1053 or PBS (CONTROL). #  $p=6.8 \times 10^{-6}$  versus L-ARGININE and  $p=7.3 \times 10^{-5}$  versus CONTROL;  
1054 \*  $p=2.8 \times 10^{-5}$  versus L-ARGININE and  $p=0.0227$  versus CONTROL.

1055 **Figure 2** – Survival rate of *Plasmodium berghei*-infected Swiss mice. Animals were pre-  
1056 treated and received a daily dose of DEXAMETHASONE, L-ARGININE, or PBS  
1057 (CONTROL).

1058 **Figure 3** - Trolox Equivalent Antioxidant Capacity (TEAC) in lungs (A) and brains (B) of  
1059 *Plasmodium berghei*-infected Swiss mice. Animals were pre-treated and received a daily  
1060 dose of DEXAMETHASONE, L-ARGININE, or PBS (CONTROL). #  $p=0.0401$  versus  
1061 DEXAMETHASONE; \*  $p=0.0281$  versus L-ARGININE and  $p=0.0033$  versus CONTROL; €  
1062  $p=0.0360$  versus L-ARGININE and  $p=0.0261$  versus DEXAMETHASONE; ¥  $p=0.0357$   
1063 versus L-ARGININE and  $p=0.0005$  versus CONTROL.

1064 **Figure 4** – Thiobarbituric Acid Reactive Substances (TBARS) in lungs (A) and brains (B)  
1065 of *Plasmodium berghei*-infected Swiss mice. Animals were pre-treated and received a  
1066 daily dose of DEXAMETHASONE, L-ARGININE, or PBS (CONTROL). €  $p=0.0294$  versus  
1067 CONTROL; #  $p=0.0282$  versus DEXAMETHASONE; \*  $p=0.0005$  versus  
1068 DEXAMETHASONE and  $p=0.0029$  versus CONTROL; ¥  $p=0.0060$  versus CONTROL.

1069 **Figure 5** - Nitrites and Nitrates in lungs (A) and brains (B) of *Plasmodium berghei*-infected  
1070 Swiss mice. Animals were pre-treated and received a daily dose of DEXAMETHASONE,  
1071 L-ARGININE, or PBS (CONTROL). #  $p=0.0005$  versus L-ARGININE and  $p=0.0394$  versus  
1072 DEXAMETHASONE; \*  $p=3.1 \times 10^{-5}$  versus DEXAMETHASONE and  $p=1.5 \times 10^{-4}$  versus  
1073 CONTROL; €  $p=3.4 \times 10^{-6}$  versus L-ARGININE and  $p=5.0 \times 10^{-4}$  versus CONTROL; ¥



1074  $p=3.6 \times 10^{-4}$  versus L-ARGININE and  $p=4.6 \times 10^{-4}$  versus CONTROL; <sup>c</sup>  $p=0.0058$  versus L-  
1075 ARGININE and  $p=0.0201$  versus CONTROL.

1076 **Figure 6** - Uric Acid levels in lungs (A) and brains (B) of *Plasmodium berghei*-infected  
1077 Swiss mice. Animals were pre-treated and received a daily dose of DEXAMETHASONE,  
1078 L-ARGININE, or PBS (CONTROL). <sup>#</sup>  $p=0.0033$  versus DEXAMETHASONE and  $p=4.3 \times 10^{-6}$   
1079 versus CONTROL; <sup>\*</sup>  $p=0.00058$  versus CONTROL; <sup>€</sup>  $p=0.00095$  versus CONTROL and  
1080  $p=0.00054$  versus DEXAMETHASONE; <sup>¥</sup>  $p=0.00071$  versus CONTROL and  $p=0.01167$   
1081 versus DEXAMETHASONE; <sup>c</sup>  $p=0.0080$  versus DEXAMETHASONE and  $p=0.0024$  versus  
1082 L-ARGININE; <sup>£</sup>  $p=0.0479$  versus DEXAMETHASONE; <sup>&</sup>  $p=0.0029$  versus CONTROL and  
1083  $p=0.0001$  versus DEXAMETHASONE; <sup>£</sup>  $p=0.0395$  versus CONTROL and  $p=0.0407$   
1084 versus DEXAMETHASONE.

1085

1086 ADDITIONAL FILE INFORMATION

1087 FILE NAME: ADDITIONAL FILE 1

1088 FILE FORMAT: .docx

1089 TITLE OF DATA: CORRELATION STUDIES

1090 DESCRIPTION OF DATA: Contain Pearson's correlation studies for all parameters studied

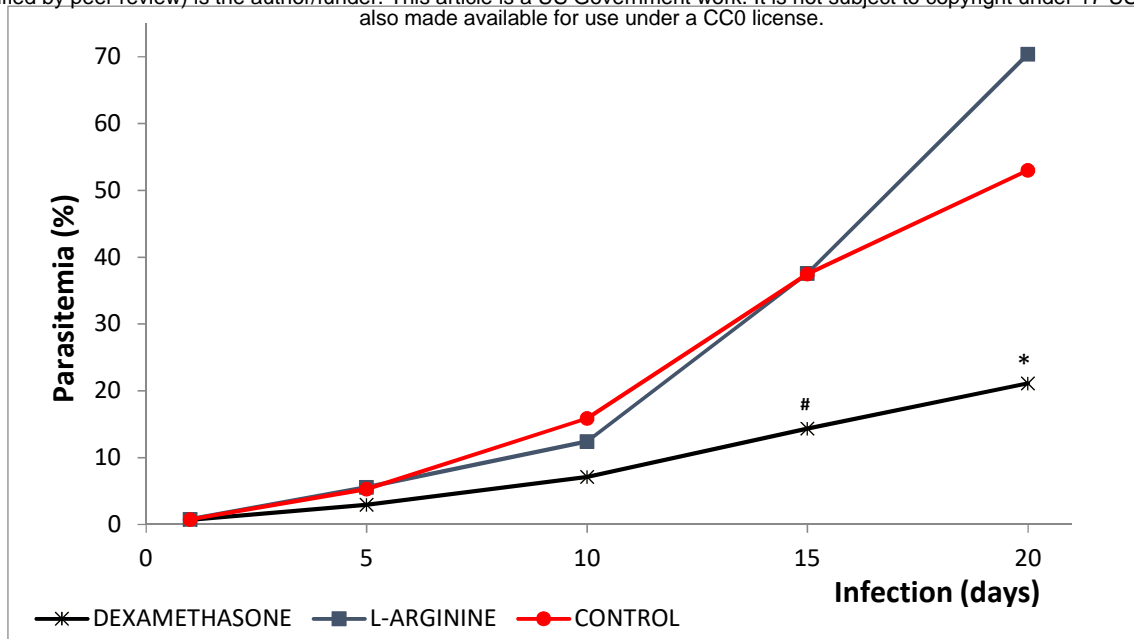

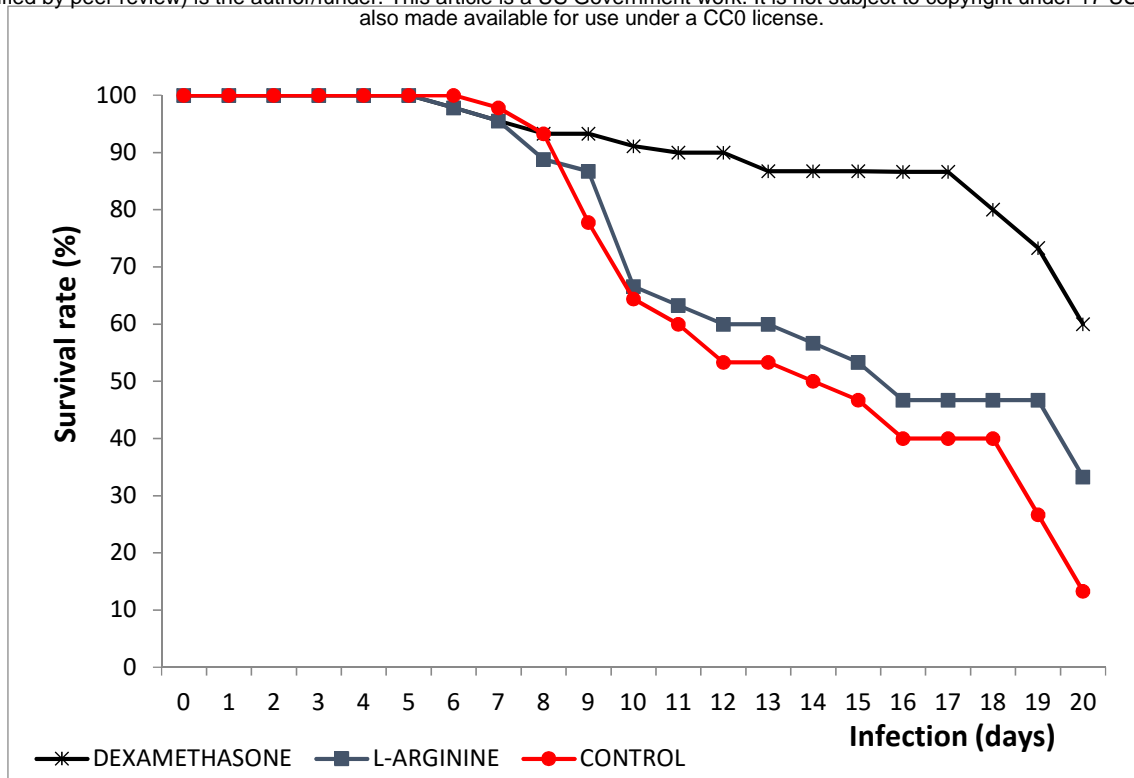

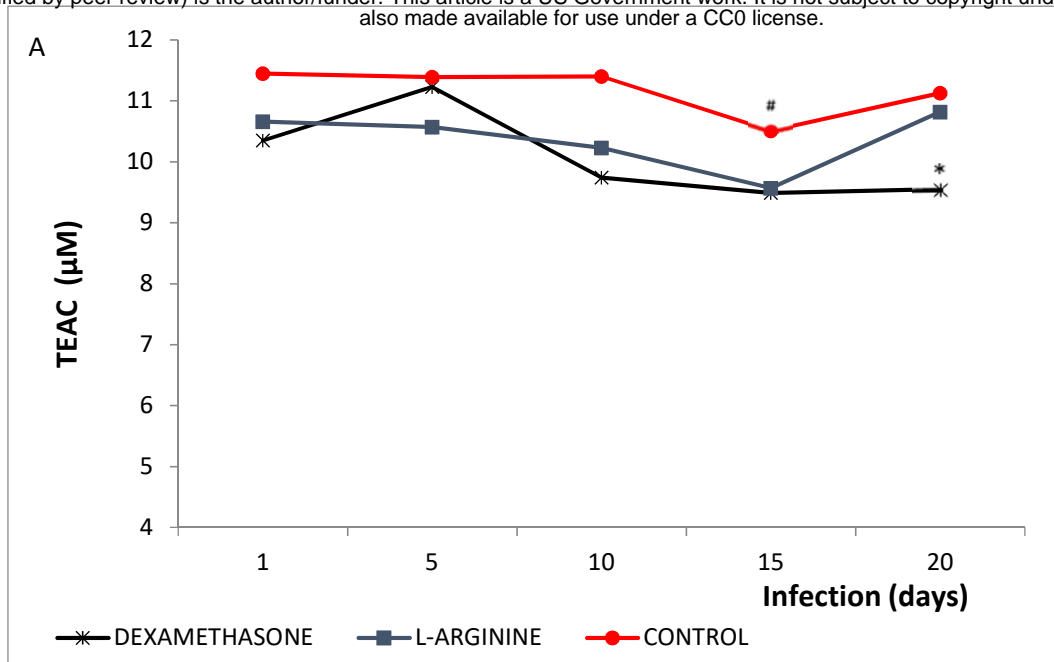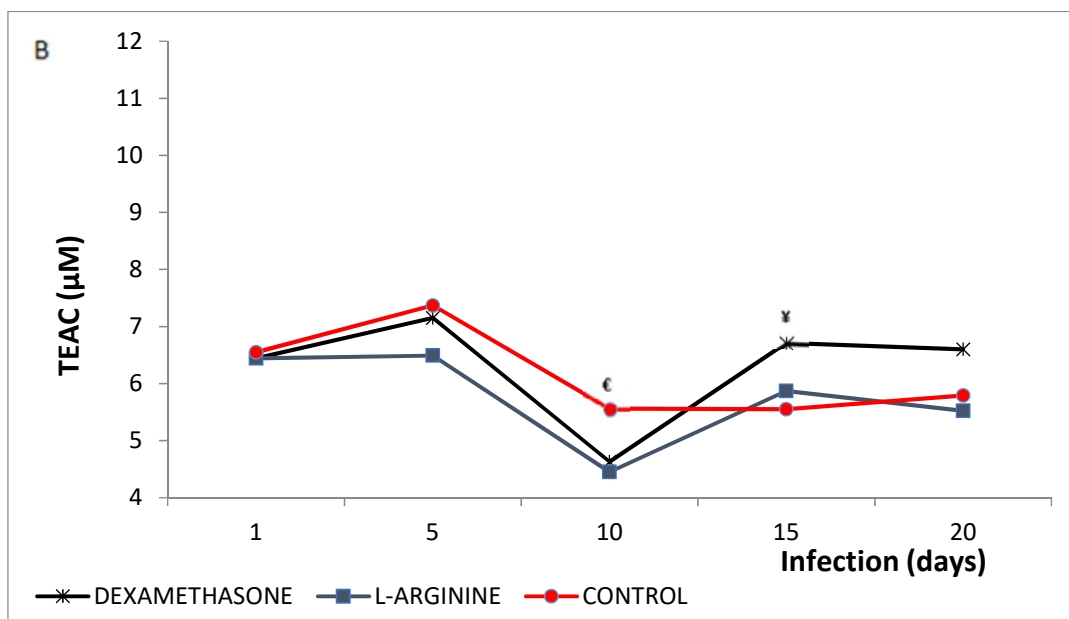

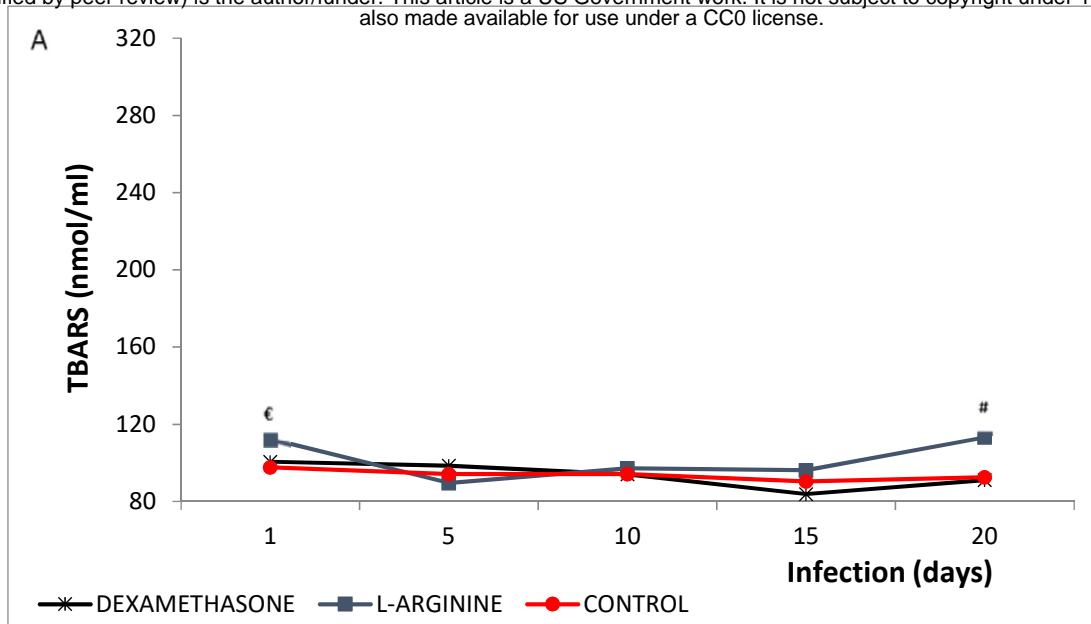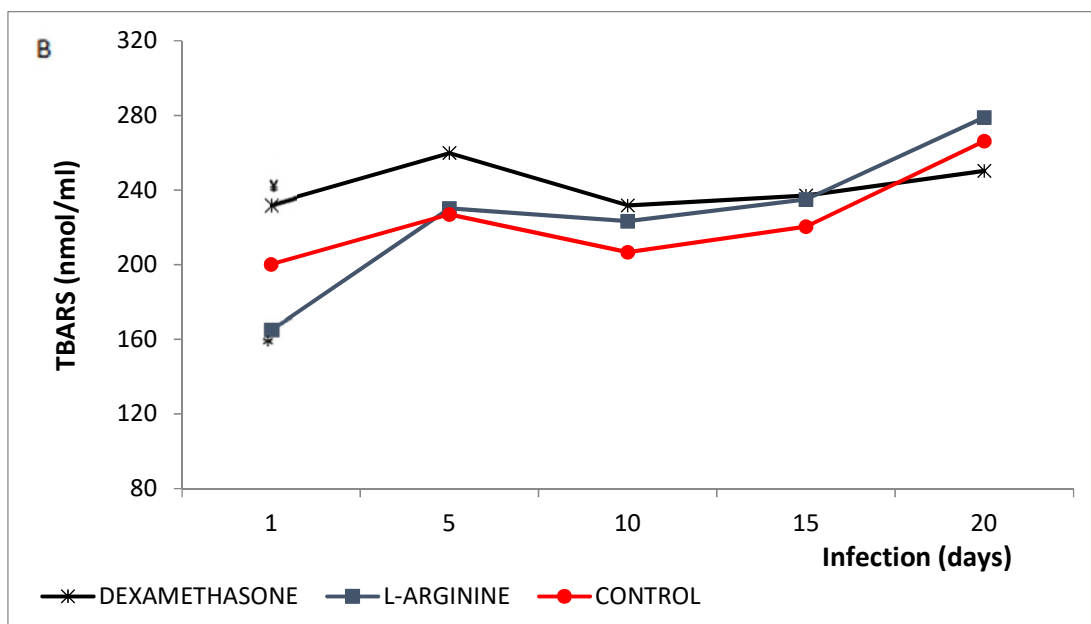

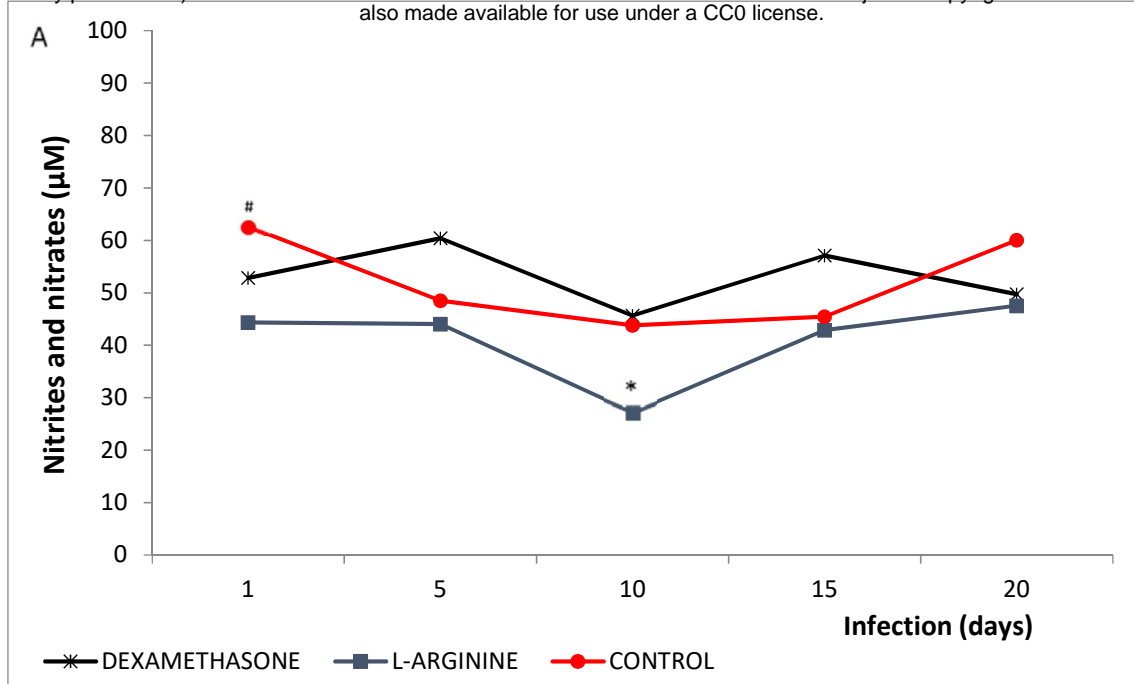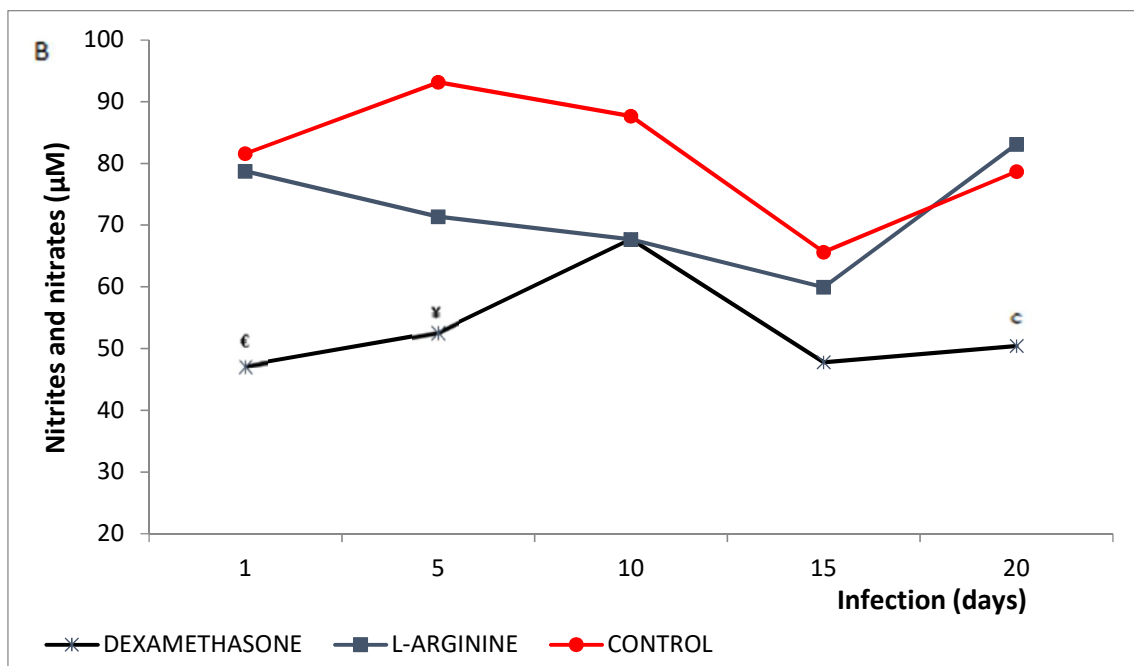

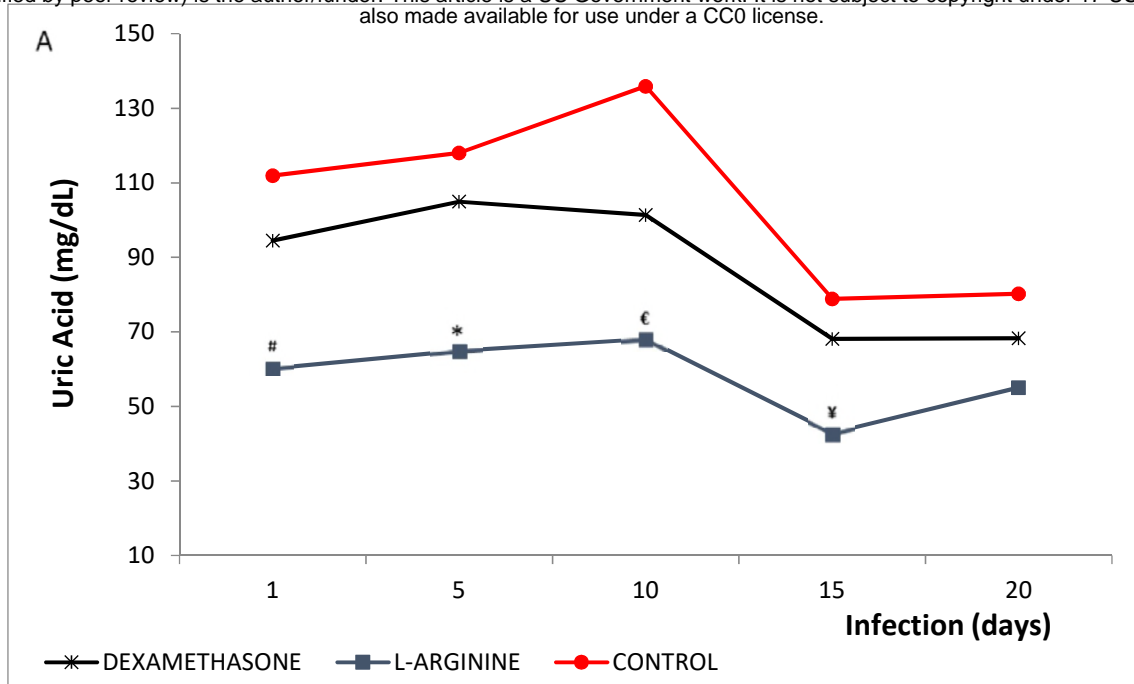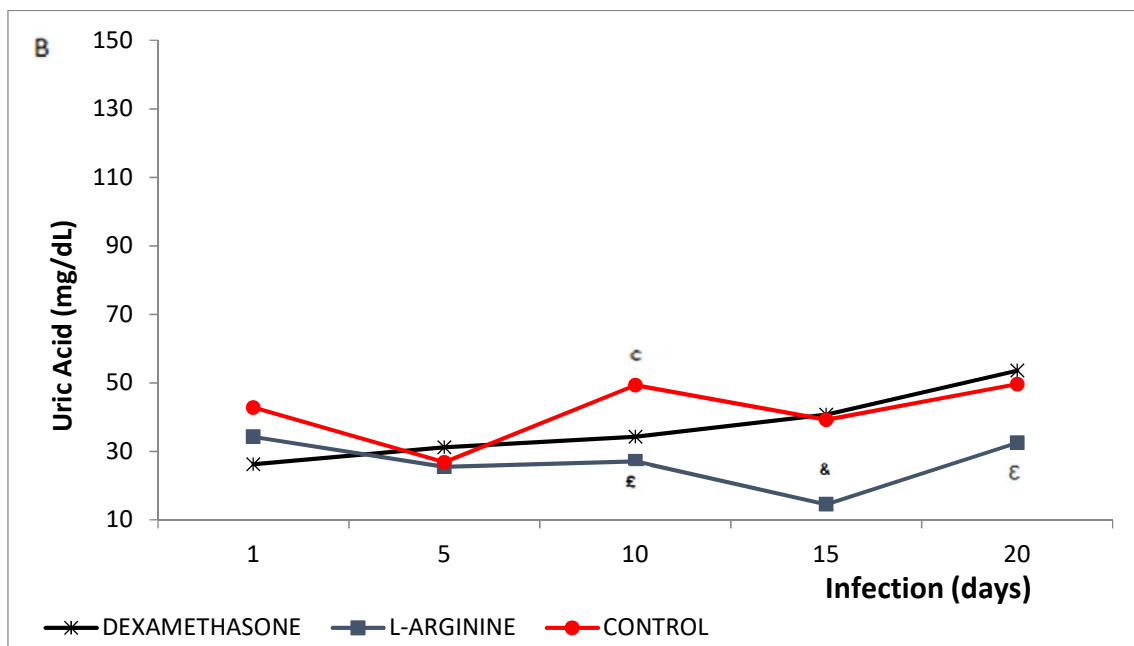

Source: https://www.biorxiv.org/content/10.1101/497966v1.full.pdf
